# Supplementary material
Source: publisher figshare collection journal article supplement (https://tandf.figshare.com/articles/dataset/_/14374261)
Supplement: Supplementary file 1 [file 1]

## Scenario 2 Validation Results: Paired t-Test

*Kevin P. Josey*

*December 20, 2017*

### 1 Study Design

Scenario 2 emulates a one-sample design with two repeated measurements for each independent sampling unit. We devise a paired t-test expressed as a general linear hypothesis test comparing the mean responses at the first and second repeated measurements. Several conditional linear missing data processes and Markov missing data processes are considered.

#### 1.1 Linear Mixed Model Inputs

##### 1.1.1 Type I Error Rates ( $\alpha$ )

0.0500

##### 1.1.2 Beta Scale Values ( $\delta_\beta$ )

0.0000, 0.5000, 1.0000, 1.5000, 2.0000, 2.5000

##### 1.1.3 Sigma Scale Values ( $\delta_\sigma$ )

1.0000

##### 1.1.4 Planned Sample Sizes ( $N$ )

20

##### 1.1.5 Matrix Inputs

$$Es(\mathbf{X}_M) = \begin{bmatrix} 1.0000 \end{bmatrix}$$

$$\boldsymbol{\beta} = \begin{bmatrix} 0.0000 \\ 1.0000 \end{bmatrix}$$

$$\mathbf{L} = \begin{bmatrix} 1.0000 & -1.0000 \end{bmatrix}$$

$$\boldsymbol{\theta}_0 = \begin{bmatrix} 0.0000 \end{bmatrix}$$

$$\boldsymbol{\Sigma}_M = \begin{bmatrix} 2.0000 & 1.0000 \\ 1.0000 & 2.0000 \end{bmatrix}$$

### 2 Conditional Linear Missing Data Models

| Pattern Index | $\boldsymbol{\pi}$ | $\gamma_{jj'}$ | Correlation Pattern |
|---------------|--------------------|----------------|---------------------|
| 1             | (1.0000, 1.0000)   | 0.25           | UN                  |
| 2             | (0.9000, 0.9000)   | 0.25           | UN                  |
| 3             | (0.9000, 0.8000)   | 0.25           | UN                  |
| 4             | (0.8000, 0.8000)   | 0.25           | UN                  |

### 3 Validation Results

#### 3.1 Summary Statistics

|                                                    |        |
|----------------------------------------------------|--------|
| Maximum Deviation from the Complete Case Scenarios | 0.0076 |
| Maximum Deviation from the Observed Case Scenarios | 0.0461 |

#### 3.2 Full Validation Results

##### 3.2.1 Complete Case Analysis

| Missing Process | Pattern Index | $\delta_\sigma$ | $\delta_\beta$ | $N$ | $\mathcal{E}(N_c)$ | Analytical Power | Empirical Power | Absolute Deviation | Iterations | Converged |
|-----------------|---------------|-----------------|----------------|-----|--------------------|------------------|-----------------|--------------------|------------|-----------|
| CLP             | 1             | 1               | 0              | 20  | 20                 | 0.05             | 0.0552          | 0.0052             | 10000      | 10000     |
| CLP             | 2             | 1               | 0              | 20  | 16.65              | 0.05             | 0.0494          | 6e-04              | 10000      | 10000     |
| CLP             | 3             | 1               | 0              | 20  | 15                 | 0.05             | 0.0515          | 0.0015             | 10000      | 10000     |
| CLP             | 4             | 1               | 0              | 20  | 13.6               | 0.05             | 0.0497          | 3e-04              | 10000      | 10000     |
| CLP             | 1             | 1               | 0.5            | 20  | 20                 | 0.3236           | 0.3245          | 9e-04              | 10000      | 10000     |
| CLP             | 2             | 1               | 0.5            | 20  | 16.65              | 0.2706           | 0.2711          | 5e-04              | 10000      | 10000     |
| CLP             | 3             | 1               | 0.5            | 20  | 15                 | 0.2442           | 0.2498          | 0.0056             | 10000      | 10000     |
| CLP             | 4             | 1               | 0.5            | 20  | 13.6               | 0.2217           | 0.2264          | 0.0047             | 10000      | 10000     |
| CLP             | 1             | 1               | 1              | 20  | 20                 | 0.8506           | 0.8486          | 0.002              | 10000      | 10000     |
| CLP             | 2             | 1               | 1              | 20  | 16.65              | 0.7675           | 0.772           | 0.0045             | 10000      | 10000     |
| CLP             | 3             | 1               | 1              | 20  | 15                 | 0.714            | 0.7125          | 0.0015             | 10000      | 10000     |
| CLP             | 4             | 1               | 1              | 20  | 13.6               | 0.6613           | 0.664           | 0.0027             | 10000      | 10000     |
| CLP             | 1             | 1               | 1.5            | 20  | 20                 | 0.9943           | 0.9933          | 0.001              | 10000      | 10000     |
| CLP             | 2             | 1               | 1.5            | 20  | 16.65              | 0.9807           | 0.9777          | 0.003              | 10000      | 10000     |
| CLP             | 3             | 1               | 1.5            | 20  | 15                 | 0.9656           | 0.959           | 0.0066             | 10000      | 10000     |
| CLP             | 4             | 1               | 1.5            | 20  | 13.6               | 0.9446           | 0.937           | 0.0076             | 10000      | 10000     |
| CLP             | 1             | 1               | 2              | 20  | 20                 | 1                | 1               | 0                  | 10000      | 10000     |
| CLP             | 2             | 1               | 2              | 20  | 16.65              | 0.9997           | 0.9991          | 6e-04              | 10000      | 10000     |
| CLP             | 3             | 1               | 2              | 20  | 15                 | 0.9989           | 0.9979          | 0.001              | 10000      | 10000     |
| CLP             | 4             | 1               | 2              | 20  | 13.6               | 0.9972           | 0.9947          | 0.0025             | 10000      | 10000     |
| CLP             | 1             | 1               | 2.5            | 20  | 20                 | 1                | 1               | 0                  | 10000      | 10000     |
| CLP             | 2             | 1               | 2.5            | 20  | 16.65              | 1                | 1               | 0                  | 10000      | 10000     |
| CLP             | 3             | 1               | 2.5            | 20  | 15                 | 1                | 0.9998          | 2e-04              | 10000      | 10000     |
| CLP             | 4             | 1               | 2.5            | 20  | 13.6               | 1                | 0.9996          | 4e-04              | 10000      | 10000     |

##### 3.2.2 Observed Case Analysis

| Missing Process | Pattern Index | $\delta_\sigma$ | $\delta_\beta$ | $N$ | $\mathcal{E}(N_m)$ | Analytical Power | Empirical Power | Absolute Deviation | Iterations | Converged |
|-----------------|---------------|-----------------|----------------|-----|--------------------|------------------|-----------------|--------------------|------------|-----------|
| CLP             | 1             | 1               | 0              | 20  | 20                 | 0.05             | 0.0552          | 0.0052             | 10000      | 10000     |
| CLP             | 2             | 1               | 0              | 20  | 18                 | 0.05             | 0.0469          | 0.0031             | 10000      | 10000     |
| CLP             | 3             | 1               | 0              | 20  | 17                 | 0.05             | 0.0548          | 0.0048             | 10000      | 10000     |
| CLP             | 4             | 1               | 0              | 20  | 16                 | 0.05             | 0.0504          | 4e-04              | 10000      | 10000     |
| CLP             | 1             | 1               | 0.5            | 20  | 20                 | 0.3236           | 0.3245          | 9e-04              | 10000      | 10000     |
| CLP             | 2             | 1               | 0.5            | 20  | 18                 | 0.2921           | 0.2798          | 0.0123             | 10000      | 10000     |
| CLP             | 3             | 1               | 0.5            | 20  | 17                 | 0.2762           | 0.2615          | 0.0147             | 10000      | 10000     |
| CLP             | 4             | 1               | 0.5            | 20  | 16                 | 0.2603           | 0.2435          | 0.0168             | 10000      | 10000     |
| CLP             | 1             | 1               | 1              | 20  | 20                 | 0.8506           | 0.8486          | 0.002              | 10000      | 10000     |
| CLP             | 2             | 1               | 1              | 20  | 18                 | 0.8048           | 0.787           | 0.0178             | 10000      | 10000     |

|     |   |   |     |    |    |        |        |        |       |       |
|-----|---|---|-----|----|----|--------|--------|--------|-------|-------|
| CLP | 3 | 1 | 1   | 20 | 17 | 0.7777 | 0.7367 | 0.041  | 10000 | 10000 |
| CLP | 4 | 1 | 1   | 20 | 16 | 0.7475 | 0.7014 | 0.0461 | 10000 | 10000 |
| CLP | 1 | 1 | 1.5 | 20 | 20 | 0.9943 | 0.9933 | 0.001  | 10000 | 10000 |
| CLP | 2 | 1 | 1.5 | 20 | 18 | 0.9881 | 0.9812 | 0.0069 | 10000 | 10000 |
| CLP | 3 | 1 | 1.5 | 20 | 17 | 0.983  | 0.9686 | 0.0144 | 10000 | 10000 |
| CLP | 4 | 1 | 1.5 | 20 | 16 | 0.9757 | 0.9562 | 0.0195 | 10000 | 10000 |
| CLP | 1 | 1 | 2   | 20 | 20 | 1      | 1      | 0      | 10000 | 10000 |
| CLP | 2 | 1 | 2   | 20 | 18 | 0.9999 | 0.9998 | 1e-04  | 10000 | 10000 |
| CLP | 3 | 1 | 2   | 20 | 17 | 0.9997 | 0.9987 | 0.001  | 10000 | 10000 |
| CLP | 4 | 1 | 2   | 20 | 16 | 0.9995 | 0.9978 | 0.0017 | 10000 | 10000 |
| CLP | 1 | 1 | 2.5 | 20 | 20 | 1      | 1      | 0      | 10000 | 10000 |
| CLP | 2 | 1 | 2.5 | 20 | 18 | 1      | 1      | 0      | 10000 | 10000 |
| CLP | 3 | 1 | 2.5 | 20 | 17 | 1      | 0.9999 | 1e-04  | 10000 | 10000 |
| CLP | 4 | 1 | 2.5 | 20 | 16 | 1      | 0.9999 | 1e-04  | 10000 | 10000 |
