# Supplementary material
Source: publisher figshare collection journal article supplement (https://tandf.figshare.com/articles/dataset/_/14374261)
Supplement: Supplementary file 2 [file 1]

# Scenario 1 Validation Results: Two-Sample t-Test for Several Error Variance Values

*Kevin P. Josey*

*December 20, 2017*

## 1 Study Design

Scenario 1 emulates a balanced, two-group study design. We devise a two-sample t-test comparing the difference in mean responses between the two samples. This example demonstrates how the power for even a simple study design can change drastically across different mean differences. Since this example considers only a single repeated measurement, only conditional linear missing data processes are considered.

### 1.1 Linear Mixed Model Inputs

#### 1.1.1 Type I Error Rates ( $\alpha$ )

0.0500

#### 1.1.2 Beta Scale Values ( $\delta_\beta$ )

0.0000, 0.0500, 0.1000, 0.1500, 0.2000, 0.2500, 0.3000, 0.3500, 0.4000, 0.4500, 0.5000,  
0.5500, 0.6000, 0.6500, 0.7000, 0.7500, 0.8000, 0.8500, 0.9000, 0.9500, 1.0000, 1.0500,  
1.1000, 1.1500, 1.2000, 1.2500, 1.3000, 1.3500, 1.4000, 1.4500, 1.5000, 1.5500, 1.6000,  
1.6500, 1.7000, 1.7500, 1.8000, 1.8500, 1.9000, 1.9500, 2.0000, 2.0500, 2.1000, 2.1500,  
2.2000, 2.2500, 2.3000, 2.3500, 2.4000, 2.4500, 2.5000

#### 1.1.3 Sigma Scale Values ( $\delta_\sigma$ )

0.3200, 1.0000, 2.0500

#### 1.1.4 Planned Sample Sizes ( $N$ )

20

#### 1.1.5 Matrix Inputs

$$Es(\mathbf{X}_M) = \begin{bmatrix} 1.0000 & 0.0000 \\ 0.0000 & 1.0000 \end{bmatrix}$$

$$\boldsymbol{\beta} = \begin{bmatrix} 0.0000 \\ 1.0000 \end{bmatrix}$$

$$\mathbf{L} = \begin{bmatrix} 1.0000 & -1.0000 \end{bmatrix}$$

$$\boldsymbol{\theta}_0 = \begin{bmatrix} 0.0000 \end{bmatrix}$$

$$\boldsymbol{\Sigma}_M = \begin{bmatrix} 1.0000 \end{bmatrix}$$

## 2 Conditional Linear Missing Data Models

| Pattern Index | $\pi$  |
|---------------|--------|
| 1             | 1.0000 |
| 2             | 0.9000 |
| 3             | 0.8000 |

## 3 Validation Results

### 3.1 Summary Statistics

|                                                    |        |
|----------------------------------------------------|--------|
| Maximum Deviation from the Complete Case Scenarios | 0.0165 |
| Maximum Deviation from the Observed Case Scenarios | NA     |

### 3.2 Full Validation Results

#### 3.2.1 Complete Case Analysis

| Missing Process | Pattern Index | $\delta_\sigma$ | $\delta_\beta$ | $N$ | $\mathcal{E}(N_c)$ | Analytical Power | Empirical Power | Absolute Deviation | Iterations | Converged |
|-----------------|---------------|-----------------|----------------|-----|--------------------|------------------|-----------------|--------------------|------------|-----------|
| CLP             | 1             | 0.32            | 0              | 20  | 20                 | 0.05             | 0.0516          | 0.0016             | 10000      | 10000     |
| CLP             | 2             | 0.32            | 0              | 20  | 18                 | 0.05             | 0.0498          | 2e-04              | 10000      | 10000     |
| CLM             | 3             | 0.32            | 0              | 20  | 16                 | 0.05             | 0.05            | 0                  | 10000      | 10000     |
| CLP             | 1             | 0.32            | 0.05           | 20  | 20                 | 0.054            | 0.0556          | 0.0016             | 10000      | 10000     |
| CLP             | 2             | 0.32            | 0.05           | 20  | 18                 | 0.0535           | 0.0546          | 0.0011             | 10000      | 10000     |
| CLP             | 3             | 0.32            | 0.05           | 20  | 16                 | 0.053            | 0.0534          | 4e-04              | 10000      | 10000     |
| CLP             | 1             | 0.32            | 0.1            | 20  | 20                 | 0.0662           | 0.0628          | 0.0034             | 10000      | 10000     |
| CLP             | 2             | 0.32            | 0.1            | 20  | 18                 | 0.0642           | 0.0611          | 0.0031             | 10000      | 10000     |
| CLP             | 3             | 0.32            | 0.1            | 20  | 16                 | 0.0622           | 0.0669          | 0.0047             | 10000      | 10000     |
| CLP             | 1             | 0.32            | 0.15           | 20  | 20                 | 0.0869           | 0.0837          | 0.0032             | 10000      | 10000     |
| CLP             | 2             | 0.32            | 0.15           | 20  | 18                 | 0.0823           | 0.0807          | 0.0016             | 10000      | 10000     |
| CLP             | 3             | 0.32            | 0.15           | 20  | 16                 | 0.0777           | 0.0786          | 9e-04              | 10000      | 10000     |
| CLP             | 1             | 0.32            | 0.2            | 20  | 20                 | 0.1163           | 0.1141          | 0.0022             | 10000      | 10000     |
| CLP             | 2             | 0.32            | 0.2            | 20  | 18                 | 0.108            | 0.1071          | 9e-04              | 10000      | 10000     |
| CLP             | 3             | 0.32            | 0.2            | 20  | 16                 | 0.0997           | 0.0956          | 0.0041             | 10000      | 10000     |
| CLP             | 1             | 0.32            | 0.25           | 20  | 20                 | 0.1549           | 0.1553          | 4e-04              | 10000      | 10000     |
| CLP             | 2             | 0.32            | 0.25           | 20  | 18                 | 0.1416           | 0.1442          | 0.0026             | 10000      | 10000     |
| CLP             | 3             | 0.32            | 0.25           | 20  | 16                 | 0.1285           | 0.1373          | 0.0088             | 10000      | 10000     |
| CLP             | 1             | 0.32            | 0.3            | 20  | 20                 | 0.2024           | 0.2037          | 0.0013             | 10000      | 10000     |
| CLP             | 2             | 0.32            | 0.3            | 20  | 18                 | 0.1832           | 0.1811          | 0.0021             | 10000      | 10000     |
| CLP             | 3             | 0.32            | 0.3            | 20  | 16                 | 0.1641           | 0.1689          | 0.0048             | 10000      | 10000     |
| CLP             | 1             | 0.32            | 0.35           | 20  | 20                 | 0.2585           | 0.2555          | 0.003              | 10000      | 10000     |
| CLP             | 2             | 0.32            | 0.35           | 20  | 18                 | 0.2325           | 0.2296          | 0.0029             | 10000      | 10000     |
| CLP             | 3             | 0.32            | 0.35           | 20  | 16                 | 0.2064           | 0.2154          | 0.009              | 10000      | 10000     |
| CLP             | 1             | 0.32            | 0.4            | 20  | 20                 | 0.322            | 0.3189          | 0.0031             | 10000      | 10000     |
| CLP             | 2             | 0.32            | 0.4            | 20  | 18                 | 0.2888           | 0.2842          | 0.0046             | 10000      | 10000     |

|     |   |      |      |    |    |        |        |        |       |       |
|-----|---|------|------|----|----|--------|--------|--------|-------|-------|
| CLP | 3 | 0.32 | 0.4  | 20 | 16 | 0.2551 | 0.268  | 0.0129 | 10000 | 10000 |
| CLP | 1 | 0.32 | 0.45 | 20 | 20 | 0.3914 | 0.3955 | 0.0041 | 10000 | 10000 |
| CLP | 2 | 0.32 | 0.45 | 20 | 18 | 0.351  | 0.3545 | 0.0035 | 10000 | 10000 |
| CLP | 3 | 0.32 | 0.45 | 20 | 16 | 0.3095 | 0.3184 | 0.0089 | 10000 | 10000 |
| CLP | 1 | 0.32 | 0.5  | 20 | 20 | 0.4645 | 0.4628 | 0.0017 | 10000 | 10000 |
| CLP | 2 | 0.32 | 0.5  | 20 | 18 | 0.4176 | 0.4179 | 3e-04  | 10000 | 10000 |
| CLP | 3 | 0.32 | 0.5  | 20 | 16 | 0.3686 | 0.369  | 4e-04  | 10000 | 10000 |
| CLP | 1 | 0.32 | 0.55 | 20 | 20 | 0.5388 | 0.5413 | 0.0025 | 10000 | 10000 |
| CLP | 2 | 0.32 | 0.55 | 20 | 18 | 0.4866 | 0.4877 | 0.0011 | 10000 | 10000 |
| CLP | 3 | 0.32 | 0.55 | 20 | 16 | 0.4309 | 0.4266 | 0.0043 | 10000 | 10000 |
| CLP | 1 | 0.32 | 0.6  | 20 | 20 | 0.6118 | 0.6103 | 0.0015 | 10000 | 10000 |
| CLP | 2 | 0.32 | 0.6  | 20 | 18 | 0.5561 | 0.5543 | 0.0018 | 10000 | 10000 |
| CLP | 3 | 0.32 | 0.6  | 20 | 16 | 0.4951 | 0.4905 | 0.0046 | 10000 | 10000 |
| CLP | 1 | 0.32 | 0.65 | 20 | 20 | 0.681  | 0.6801 | 9e-04  | 10000 | 10000 |
| CLP | 2 | 0.32 | 0.65 | 20 | 18 | 0.6238 | 0.6322 | 0.0084 | 10000 | 10000 |
| CLP | 3 | 0.32 | 0.65 | 20 | 16 | 0.5594 | 0.569  | 0.0096 | 10000 | 10000 |
| CLP | 1 | 0.32 | 0.7  | 20 | 20 | 0.7444 | 0.7398 | 0.0046 | 10000 | 10000 |
| CLP | 2 | 0.32 | 0.7  | 20 | 18 | 0.6879 | 0.6844 | 0.0035 | 10000 | 10000 |
| CLP | 3 | 0.32 | 0.7  | 20 | 16 | 0.6221 | 0.6386 | 0.0165 | 10000 | 10000 |
| CLP | 1 | 0.32 | 0.75 | 20 | 20 | 0.8005 | 0.7969 | 0.0036 | 10000 | 10000 |
| CLP | 2 | 0.32 | 0.75 | 20 | 18 | 0.7468 | 0.7525 | 0.0057 | 10000 | 10000 |
| CLP | 3 | 0.32 | 0.75 | 20 | 16 | 0.6817 | 0.6883 | 0.0066 | 10000 | 10000 |
| CLP | 1 | 0.32 | 0.8  | 20 | 20 | 0.8484 | 0.8448 | 0.0036 | 10000 | 10000 |
| CLP | 2 | 0.32 | 0.8  | 20 | 18 | 0.7992 | 0.8017 | 0.0025 | 10000 | 10000 |
| CLP | 3 | 0.32 | 0.8  | 20 | 16 | 0.7369 | 0.7349 | 0.002  | 10000 | 10000 |
| CLP | 1 | 0.32 | 0.85 | 20 | 20 | 0.888  | 0.8957 | 0.0077 | 10000 | 10000 |
| CLP | 2 | 0.32 | 0.85 | 20 | 18 | 0.8445 | 0.8457 | 0.0012 | 10000 | 10000 |
| CLP | 3 | 0.32 | 0.85 | 20 | 16 | 0.7868 | 0.7867 | 1e-04  | 10000 | 10000 |
| CLP | 1 | 0.32 | 0.9  | 20 | 20 | 0.9196 | 0.9175 | 0.0021 | 10000 | 10000 |
| CLP | 2 | 0.32 | 0.9  | 20 | 18 | 0.8824 | 0.8849 | 0.0025 | 10000 | 10000 |
| CLP | 3 | 0.32 | 0.9  | 20 | 16 | 0.8306 | 0.8292 | 0.0014 | 10000 | 10000 |
| CLP | 1 | 0.32 | 0.95 | 20 | 20 | 0.9439 | 0.946  | 0.0021 | 10000 | 10000 |
| CLP | 2 | 0.32 | 0.95 | 20 | 18 | 0.9133 | 0.9092 | 0.0041 | 10000 | 10000 |
| CLP | 3 | 0.32 | 0.95 | 20 | 16 | 0.8682 | 0.8642 | 0.004  | 10000 | 10000 |
| CLP | 1 | 0.32 | 1    | 20 | 20 | 0.962  | 0.9598 | 0.0022 | 10000 | 10000 |
| CLP | 2 | 0.32 | 1    | 20 | 18 | 0.9376 | 0.9369 | 7e-04  | 10000 | 10000 |
| CLP | 3 | 0.32 | 1    | 20 | 16 | 0.8995 | 0.8955 | 0.004  | 10000 | 10000 |
| CLP | 1 | 0.32 | 1.05 | 20 | 20 | 0.975  | 0.9766 | 0.0016 | 10000 | 10000 |
| CLP | 2 | 0.32 | 1.05 | 20 | 18 | 0.9563 | 0.9569 | 6e-04  | 10000 | 10000 |
| CLP | 3 | 0.32 | 1.05 | 20 | 16 | 0.925  | 0.9198 | 0.0052 | 10000 | 10000 |
| CLP | 1 | 0.32 | 1.1  | 20 | 20 | 0.9841 | 0.9859 | 0.0018 | 10000 | 10000 |
| CLP | 2 | 0.32 | 1.1  | 20 | 18 | 0.9701 | 0.9687 | 0.0014 | 10000 | 10000 |
| CLP | 3 | 0.32 | 1.1  | 20 | 16 | 0.9453 | 0.9392 | 0.0061 | 10000 | 10000 |
| CLP | 1 | 0.32 | 1.15 | 20 | 20 | 0.9902 | 0.9902 | 0      | 10000 | 10000 |
| CLP | 2 | 0.32 | 1.15 | 20 | 18 | 0.9801 | 0.9785 | 0.0016 | 10000 | 10000 |

|     |   |      |      |    |    |        |        |        |       |       |
|-----|---|------|------|----|----|--------|--------|--------|-------|-------|
| CLP | 3 | 0.32 | 1.15 | 20 | 16 | 0.9609 | 0.953  | 0.0079 | 10000 | 10000 |
| CLP | 1 | 0.32 | 1.2  | 20 | 20 | 0.9941 | 0.9947 | 6e-04  | 10000 | 10000 |
| CLP | 2 | 0.32 | 1.2  | 20 | 18 | 0.9871 | 0.9844 | 0.0027 | 10000 | 10000 |
| CLP | 3 | 0.32 | 1.2  | 20 | 16 | 0.9727 | 0.9714 | 0.0013 | 10000 | 10000 |
| CLP | 1 | 0.32 | 1.25 | 20 | 20 | 0.9966 | 0.9968 | 2e-04  | 10000 | 10000 |
| CLP | 2 | 0.32 | 1.25 | 20 | 18 | 0.9919 | 0.9895 | 0.0024 | 10000 | 10000 |
| CLP | 3 | 0.32 | 1.25 | 20 | 16 | 0.9814 | 0.9805 | 9e-04  | 10000 | 10000 |
| CLP | 1 | 0.32 | 1.3  | 20 | 20 | 0.9981 | 0.998  | 1e-04  | 10000 | 10000 |
| CLP | 2 | 0.32 | 1.3  | 20 | 18 | 0.995  | 0.9935 | 0.0015 | 10000 | 10000 |
| CLP | 3 | 0.32 | 1.3  | 20 | 16 | 0.9876 | 0.9832 | 0.0044 | 10000 | 10000 |
| CLP | 1 | 0.32 | 1.35 | 20 | 20 | 0.9989 | 0.9988 | 1e-04  | 10000 | 10000 |
| CLP | 2 | 0.32 | 1.35 | 20 | 18 | 0.997  | 0.9957 | 0.0013 | 10000 | 10000 |
| CLP | 3 | 0.32 | 1.35 | 20 | 16 | 0.9919 | 0.9883 | 0.0036 | 10000 | 10000 |
| CLP | 1 | 0.32 | 1.4  | 20 | 20 | 0.9994 | 0.9993 | 1e-04  | 10000 | 10000 |
| CLP | 2 | 0.32 | 1.4  | 20 | 18 | 0.9983 | 0.998  | 3e-04  | 10000 | 10000 |
| CLP | 3 | 0.32 | 1.4  | 20 | 16 | 0.9948 | 0.992  | 0.0028 | 10000 | 10000 |
| CLP | 1 | 0.32 | 1.45 | 20 | 20 | 0.9997 | 1      | 3e-04  | 10000 | 10000 |
| CLP | 2 | 0.32 | 1.45 | 20 | 18 | 0.999  | 0.9982 | 8e-04  | 10000 | 10000 |
| CLP | 3 | 0.32 | 1.45 | 20 | 16 | 0.9968 | 0.9944 | 0.0024 | 10000 | 10000 |
| CLP | 1 | 0.32 | 1.5  | 20 | 20 | 0.9999 | 0.9999 | 0      | 10000 | 10000 |
| CLP | 2 | 0.32 | 1.5  | 20 | 18 | 0.9995 | 0.9997 | 2e-04  | 10000 | 10000 |
| CLP | 3 | 0.32 | 1.5  | 20 | 16 | 0.998  | 0.997  | 0.001  | 10000 | 10000 |
| CLP | 1 | 0.32 | 1.55 | 20 | 20 | 0.9999 | 1      | 1e-04  | 10000 | 10000 |
| CLP | 2 | 0.32 | 1.55 | 20 | 18 | 0.9997 | 0.9999 | 2e-04  | 10000 | 10000 |
| CLP | 3 | 0.32 | 1.55 | 20 | 16 | 0.9988 | 0.9971 | 0.0017 | 10000 | 10000 |
| CLP | 1 | 0.32 | 1.6  | 20 | 20 | 1      | 0.9999 | 1e-04  | 10000 | 10000 |
| CLP | 2 | 0.32 | 1.6  | 20 | 18 | 0.9999 | 0.9998 | 1e-04  | 10000 | 10000 |
| CLP | 3 | 0.32 | 1.6  | 20 | 16 | 0.9993 | 0.9985 | 8e-04  | 10000 | 10000 |
| CLP | 1 | 0.32 | 1.65 | 20 | 20 | 1      | 1      | 0      | 10000 | 10000 |
| CLP | 2 | 0.32 | 1.65 | 20 | 18 | 0.9999 | 0.9998 | 1e-04  | 10000 | 10000 |
| CLP | 3 | 0.32 | 1.65 | 20 | 16 | 0.9996 | 0.9991 | 5e-04  | 10000 | 10000 |
| CLP | 1 | 0.32 | 1.7  | 20 | 20 | 1      | 1      | 0      | 10000 | 10000 |
| CLP | 2 | 0.32 | 1.7  | 20 | 18 | 1      | 1      | 0      | 10000 | 10000 |
| CLP | 3 | 0.32 | 1.7  | 20 | 16 | 0.9998 | 0.9995 | 3e-04  | 10000 | 10000 |
| CLP | 1 | 0.32 | 1.75 | 20 | 20 | 1      | 1      | 0      | 10000 | 10000 |
| CLP | 2 | 0.32 | 1.75 | 20 | 18 | 1      | 1      | 0      | 10000 | 10000 |
| CLP | 3 | 0.32 | 1.75 | 20 | 16 | 0.9999 | 0.9997 | 2e-04  | 10000 | 10000 |
| CLP | 1 | 0.32 | 1.8  | 20 | 20 | 1      | 1      | 0      | 10000 | 10000 |
| CLP | 2 | 0.32 | 1.8  | 20 | 18 | 1      | 1      | 0      | 10000 | 10000 |
| CLP | 3 | 0.32 | 1.8  | 20 | 16 | 0.9999 | 0.9998 | 1e-04  | 10000 | 10000 |
| CLP | 1 | 0.32 | 1.85 | 20 | 20 | 1      | 1      | 0      | 10000 | 10000 |
| CLP | 2 | 0.32 | 1.85 | 20 | 18 | 1      | 1      | 0      | 10000 | 10000 |
| CLP | 3 | 0.32 | 1.85 | 20 | 16 | 1      | 0.9998 | 2e-04  | 10000 | 10000 |
| CLP | 1 | 0.32 | 1.9  | 20 | 20 | 1      | 1      | 0      | 10000 | 10000 |
| CLP | 2 | 0.32 | 1.9  | 20 | 18 | 1      | 1      | 0      | 10000 | 10000 |

|     |   |      |      |    |    |        |        |        |       |       |
|-----|---|------|------|----|----|--------|--------|--------|-------|-------|
| CLP | 3 | 0.32 | 1.9  | 20 | 16 | 1      | 0.9999 | 1e-04  | 10000 | 10000 |
| CLP | 1 | 0.32 | 1.95 | 20 | 20 | 1      | 1      | 0      | 10000 | 10000 |
| CLP | 2 | 0.32 | 1.95 | 20 | 18 | 1      | 1      | 0      | 10000 | 10000 |
| CLP | 3 | 0.32 | 1.95 | 20 | 16 | 1      | 0.9999 | 1e-04  | 10000 | 10000 |
| CLP | 1 | 0.32 | 2    | 20 | 20 | 1      | 1      | 0      | 10000 | 10000 |
| CLP | 2 | 0.32 | 2    | 20 | 18 | 1      | 1      | 0      | 10000 | 10000 |
| CLP | 3 | 0.32 | 2    | 20 | 16 | 1      | 0.9997 | 3e-04  | 10000 | 10000 |
| CLP | 1 | 0.32 | 2.05 | 20 | 20 | 1      | 1      | 0      | 10000 | 10000 |
| CLP | 2 | 0.32 | 2.05 | 20 | 18 | 1      | 1      | 0      | 10000 | 10000 |
| CLP | 3 | 0.32 | 2.05 | 20 | 16 | 1      | 0.9999 | 1e-04  | 10000 | 10000 |
| CLP | 1 | 0.32 | 2.1  | 20 | 20 | 1      | 1      | 0      | 10000 | 10000 |
| CLP | 2 | 0.32 | 2.1  | 20 | 18 | 1      | 1      | 0      | 10000 | 10000 |
| CLP | 3 | 0.32 | 2.1  | 20 | 16 | 1      | 1      | 0      | 10000 | 10000 |
| CLP | 1 | 0.32 | 2.15 | 20 | 20 | 1      | 1      | 0      | 10000 | 10000 |
| CLP | 2 | 0.32 | 2.15 | 20 | 18 | 1      | 1      | 0      | 10000 | 10000 |
| CLP | 3 | 0.32 | 2.15 | 20 | 16 | 1      | 1      | 0      | 10000 | 10000 |
| CLP | 1 | 0.32 | 2.2  | 20 | 20 | 1      | 1      | 0      | 10000 | 10000 |
| CLP | 2 | 0.32 | 2.2  | 20 | 18 | 1      | 1      | 0      | 10000 | 10000 |
| CLP | 3 | 0.32 | 2.2  | 20 | 16 | 1      | 1      | 0      | 10000 | 10000 |
| CLP | 1 | 0.32 | 2.25 | 20 | 20 | 1      | 1      | 0      | 10000 | 10000 |
| CLP | 2 | 0.32 | 2.25 | 20 | 18 | 1      | 1      | 0      | 10000 | 10000 |
| CLP | 3 | 0.32 | 2.25 | 20 | 16 | 1      | 1      | 0      | 10000 | 10000 |
| CLP | 1 | 0.32 | 2.3  | 20 | 20 | 1      | 1      | 0      | 10000 | 10000 |
| CLP | 2 | 0.32 | 2.3  | 20 | 18 | 1      | 1      | 0      | 10000 | 10000 |
| CLP | 3 | 0.32 | 2.3  | 20 | 16 | 1      | 1      | 0      | 10000 | 10000 |
| CLP | 1 | 0.32 | 2.35 | 20 | 20 | 1      | 1      | 0      | 10000 | 10000 |
| CLP | 2 | 0.32 | 2.35 | 20 | 18 | 1      | 1      | 0      | 10000 | 10000 |
| CLP | 3 | 0.32 | 2.35 | 20 | 16 | 1      | 1      | 0      | 10000 | 10000 |
| CLP | 1 | 0.32 | 2.4  | 20 | 20 | 1      | 1      | 0      | 10000 | 10000 |
| CLP | 2 | 0.32 | 2.4  | 20 | 18 | 1      | 1      | 0      | 10000 | 10000 |
| CLP | 3 | 0.32 | 2.4  | 20 | 16 | 1      | 1      | 0      | 10000 | 10000 |
| CLP | 1 | 0.32 | 2.45 | 20 | 20 | 1      | 1      | 0      | 10000 | 10000 |
| CLP | 2 | 0.32 | 2.45 | 20 | 18 | 1      | 1      | 0      | 10000 | 10000 |
| CLP | 3 | 0.32 | 2.45 | 20 | 16 | 1      | 1      | 0      | 10000 | 10000 |
| CLP | 1 | 0.32 | 2.5  | 20 | 20 | 1      | 1      | 0      | 10000 | 10000 |
| CLP | 2 | 0.32 | 2.5  | 20 | 18 | 1      | 1      | 0      | 10000 | 10000 |
| CLP | 3 | 0.32 | 2.5  | 20 | 16 | 1      | 1      | 0      | 10000 | 10000 |
| CLP | 1 | 1    | 0    | 20 | 20 | 0.05   | 0.0524 | 0.0024 | 10000 | 10000 |
| CLP | 2 | 1    | 0    | 20 | 18 | 0.05   | 0.0479 | 0.0021 | 10000 | 10000 |
| CLP | 3 | 1    | 0    | 20 | 16 | 0.05   | 0.0511 | 0.0011 | 10000 | 10000 |
| CLP | 1 | 1    | 0.05 | 20 | 20 | 0.0513 | 0.0499 | 0.0014 | 10000 | 10000 |
| CLP | 2 | 1    | 0.05 | 20 | 18 | 0.0511 | 0.0507 | 4e-04  | 10000 | 10000 |
| CLP | 3 | 1    | 0.05 | 20 | 16 | 0.051  | 0.0514 | 4e-04  | 10000 | 10000 |
| CLP | 1 | 1    | 0.1  | 20 | 20 | 0.0552 | 0.0536 | 0.0016 | 10000 | 10000 |
| CLP | 2 | 1    | 0.1  | 20 | 18 | 0.0545 | 0.0568 | 0.0023 | 10000 | 10000 |

|     |   |   |      |    |    |        |        |        |       |       |
|-----|---|---|------|----|----|--------|--------|--------|-------|-------|
| CLP | 3 | 1 | 0.1  | 20 | 16 | 0.0539 | 0.0583 | 0.0044 | 10000 | 10000 |
| CLP | 1 | 1 | 0.15 | 20 | 20 | 0.0617 | 0.0643 | 0.0026 | 10000 | 10000 |
| CLP | 2 | 1 | 0.15 | 20 | 18 | 0.0602 | 0.0566 | 0.0036 | 10000 | 10000 |
| CLP | 3 | 1 | 0.15 | 20 | 16 | 0.0588 | 0.0526 | 0.0062 | 10000 | 10000 |
| CLP | 1 | 1 | 0.2  | 20 | 20 | 0.0708 | 0.0676 | 0.0032 | 10000 | 10000 |
| CLP | 2 | 1 | 0.2  | 20 | 18 | 0.0682 | 0.0671 | 0.0011 | 10000 | 10000 |
| CLP | 3 | 1 | 0.2  | 20 | 16 | 0.0657 | 0.0659 | 2e-04  | 10000 | 10000 |
| CLP | 1 | 1 | 0.25 | 20 | 20 | 0.0827 | 0.0826 | 1e-04  | 10000 | 10000 |
| CLP | 2 | 1 | 0.25 | 20 | 18 | 0.0786 | 0.0791 | 5e-04  | 10000 | 10000 |
| CLP | 3 | 1 | 0.25 | 20 | 16 | 0.0746 | 0.0722 | 0.0024 | 10000 | 10000 |
| CLP | 1 | 1 | 0.3  | 20 | 20 | 0.0974 | 0.1006 | 0.0032 | 10000 | 10000 |
| CLP | 2 | 1 | 0.3  | 20 | 18 | 0.0915 | 0.0892 | 0.0023 | 10000 | 10000 |
| CLP | 3 | 1 | 0.3  | 20 | 16 | 0.0856 | 0.0846 | 0.001  | 10000 | 10000 |
| CLP | 1 | 1 | 0.35 | 20 | 20 | 0.115  | 0.1206 | 0.0056 | 10000 | 10000 |
| CLP | 2 | 1 | 0.35 | 20 | 18 | 0.1068 | 0.1032 | 0.0036 | 10000 | 10000 |
| CLP | 3 | 1 | 0.35 | 20 | 16 | 0.0987 | 0.1012 | 0.0025 | 10000 | 10000 |
| CLP | 1 | 1 | 0.4  | 20 | 20 | 0.1355 | 0.1319 | 0.0036 | 10000 | 10000 |
| CLP | 2 | 1 | 0.4  | 20 | 18 | 0.1247 | 0.1271 | 0.0024 | 10000 | 10000 |
| CLP | 3 | 1 | 0.4  | 20 | 16 | 0.114  | 0.1108 | 0.0032 | 10000 | 10000 |
| CLP | 1 | 1 | 0.45 | 20 | 20 | 0.1588 | 0.1644 | 0.0056 | 10000 | 10000 |
| CLP | 2 | 1 | 0.45 | 20 | 18 | 0.1451 | 0.1463 | 0.0012 | 10000 | 10000 |
| CLP | 3 | 1 | 0.45 | 20 | 16 | 0.1314 | 0.1296 | 0.0018 | 10000 | 10000 |
| CLP | 1 | 1 | 0.5  | 20 | 20 | 0.1851 | 0.1915 | 0.0064 | 10000 | 10000 |
| CLP | 2 | 1 | 0.5  | 20 | 18 | 0.168  | 0.1612 | 0.0068 | 10000 | 10000 |
| CLP | 3 | 1 | 0.5  | 20 | 16 | 0.1511 | 0.1547 | 0.0036 | 10000 | 10000 |
| CLP | 1 | 1 | 0.55 | 20 | 20 | 0.2142 | 0.2112 | 0.003  | 10000 | 10000 |
| CLP | 2 | 1 | 0.55 | 20 | 18 | 0.1935 | 0.1958 | 0.0023 | 10000 | 10000 |
| CLP | 3 | 1 | 0.55 | 20 | 16 | 0.1729 | 0.1766 | 0.0037 | 10000 | 10000 |
| CLP | 1 | 1 | 0.6  | 20 | 20 | 0.2459 | 0.2521 | 0.0062 | 10000 | 10000 |
| CLP | 2 | 1 | 0.6  | 20 | 18 | 0.2214 | 0.2178 | 0.0036 | 10000 | 10000 |
| CLP | 3 | 1 | 0.6  | 20 | 16 | 0.1969 | 0.2047 | 0.0078 | 10000 | 10000 |
| CLP | 1 | 1 | 0.65 | 20 | 20 | 0.2802 | 0.2727 | 0.0075 | 10000 | 10000 |
| CLP | 2 | 1 | 0.65 | 20 | 18 | 0.2516 | 0.2494 | 0.0022 | 10000 | 10000 |
| CLP | 3 | 1 | 0.65 | 20 | 16 | 0.223  | 0.2224 | 6e-04  | 10000 | 10000 |
| CLP | 1 | 1 | 0.7  | 20 | 20 | 0.3167 | 0.3124 | 0.0043 | 10000 | 10000 |
| CLP | 2 | 1 | 0.7  | 20 | 18 | 0.284  | 0.2776 | 0.0064 | 10000 | 10000 |
| CLP | 3 | 1 | 0.7  | 20 | 16 | 0.251  | 0.2515 | 5e-04  | 10000 | 10000 |
| CLP | 1 | 1 | 0.75 | 20 | 20 | 0.3551 | 0.3474 | 0.0077 | 10000 | 10000 |
| CLP | 2 | 1 | 0.75 | 20 | 18 | 0.3183 | 0.3227 | 0.0044 | 10000 | 10000 |
| CLP | 3 | 1 | 0.75 | 20 | 16 | 0.2809 | 0.2813 | 4e-04  | 10000 | 10000 |
| CLP | 1 | 1 | 0.8  | 20 | 20 | 0.3951 | 0.3953 | 2e-04  | 10000 | 10000 |
| CLP | 2 | 1 | 0.8  | 20 | 18 | 0.3543 | 0.3581 | 0.0038 | 10000 | 10000 |
| CLP | 3 | 1 | 0.8  | 20 | 16 | 0.3124 | 0.3033 | 0.0091 | 10000 | 10000 |
| CLP | 1 | 1 | 0.85 | 20 | 20 | 0.4362 | 0.4331 | 0.0031 | 10000 | 10000 |
| CLP | 2 | 1 | 0.85 | 20 | 18 | 0.3916 | 0.3872 | 0.0044 | 10000 | 10000 |

|     |   |   |      |    |    |        |        |        |       |       |
|-----|---|---|------|----|----|--------|--------|--------|-------|-------|
| CLP | 3 | 1 | 0.85 | 20 | 16 | 0.3455 | 0.3571 | 0.0116 | 10000 | 10000 |
| CLP | 1 | 1 | 0.9  | 20 | 20 | 0.4781 | 0.4739 | 0.0042 | 10000 | 10000 |
| CLP | 2 | 1 | 0.9  | 20 | 18 | 0.43   | 0.4313 | 0.0013 | 10000 | 10000 |
| CLP | 3 | 1 | 0.9  | 20 | 16 | 0.3797 | 0.3859 | 0.0062 | 10000 | 10000 |
| CLP | 1 | 1 | 0.95 | 20 | 20 | 0.5201 | 0.5182 | 0.0019 | 10000 | 10000 |
| CLP | 2 | 1 | 0.95 | 20 | 18 | 0.4691 | 0.4702 | 0.0011 | 10000 | 10000 |
| CLP | 3 | 1 | 0.95 | 20 | 16 | 0.415  | 0.4214 | 0.0064 | 10000 | 10000 |
| CLP | 1 | 1 | 1    | 20 | 20 | 0.562  | 0.5637 | 0.0017 | 10000 | 10000 |
| CLP | 2 | 1 | 1    | 20 | 18 | 0.5085 | 0.5155 | 0.007  | 10000 | 10000 |
| CLP | 3 | 1 | 1    | 20 | 16 | 0.4509 | 0.4532 | 0.0023 | 10000 | 10000 |
| CLP | 1 | 1 | 1.05 | 20 | 20 | 0.6032 | 0.6003 | 0.0029 | 10000 | 10000 |
| CLP | 2 | 1 | 1.05 | 20 | 18 | 0.5477 | 0.5555 | 0.0078 | 10000 | 10000 |
| CLP | 3 | 1 | 1.05 | 20 | 16 | 0.4873 | 0.4861 | 0.0012 | 10000 | 10000 |
| CLP | 1 | 1 | 1.1  | 20 | 20 | 0.6432 | 0.6471 | 0.0039 | 10000 | 10000 |
| CLP | 2 | 1 | 1.1  | 20 | 18 | 0.5866 | 0.5902 | 0.0036 | 10000 | 10000 |
| CLP | 3 | 1 | 1.1  | 20 | 16 | 0.5238 | 0.5305 | 0.0067 | 10000 | 10000 |
| CLP | 1 | 1 | 1.15 | 20 | 20 | 0.6818 | 0.6828 | 0.001  | 10000 | 10000 |
| CLP | 2 | 1 | 1.15 | 20 | 18 | 0.6245 | 0.6251 | 6e-04  | 10000 | 10000 |
| CLP | 3 | 1 | 1.15 | 20 | 16 | 0.5601 | 0.569  | 0.0089 | 10000 | 10000 |
| CLP | 1 | 1 | 1.2  | 20 | 20 | 0.7184 | 0.7109 | 0.0075 | 10000 | 10000 |
| CLP | 2 | 1 | 1.2  | 20 | 18 | 0.6613 | 0.6647 | 0.0034 | 10000 | 10000 |
| CLP | 3 | 1 | 1.2  | 20 | 16 | 0.5958 | 0.5917 | 0.0041 | 10000 | 10000 |
| CLP | 1 | 1 | 1.25 | 20 | 20 | 0.7529 | 0.7482 | 0.0047 | 10000 | 10000 |
| CLP | 2 | 1 | 1.25 | 20 | 18 | 0.6966 | 0.7072 | 0.0106 | 10000 | 10000 |
| CLP | 3 | 1 | 1.25 | 20 | 16 | 0.6308 | 0.628  | 0.0028 | 10000 | 10000 |
| CLP | 1 | 1 | 1.3  | 20 | 20 | 0.7849 | 0.7876 | 0.0027 | 10000 | 10000 |
| CLP | 2 | 1 | 1.3  | 20 | 18 | 0.7302 | 0.7314 | 0.0012 | 10000 | 10000 |
| CLP | 3 | 1 | 1.3  | 20 | 16 | 0.6647 | 0.6665 | 0.0018 | 10000 | 10000 |
| CLP | 1 | 1 | 1.35 | 20 | 20 | 0.8145 | 0.8153 | 8e-04  | 10000 | 10000 |
| CLP | 2 | 1 | 1.35 | 20 | 18 | 0.7618 | 0.7576 | 0.0042 | 10000 | 10000 |
| CLP | 3 | 1 | 1.35 | 20 | 16 | 0.6973 | 0.699  | 0.0017 | 10000 | 10000 |
| CLP | 1 | 1 | 1.4  | 20 | 20 | 0.8413 | 0.8403 | 0.001  | 10000 | 10000 |
| CLP | 2 | 1 | 1.4  | 20 | 18 | 0.7912 | 0.8018 | 0.0106 | 10000 | 10000 |
| CLP | 3 | 1 | 1.4  | 20 | 16 | 0.7284 | 0.7267 | 0.0017 | 10000 | 10000 |
| CLP | 1 | 1 | 1.45 | 20 | 20 | 0.8655 | 0.8664 | 9e-04  | 10000 | 10000 |
| CLP | 2 | 1 | 1.45 | 20 | 18 | 0.8184 | 0.8152 | 0.0032 | 10000 | 10000 |
| CLP | 3 | 1 | 1.45 | 20 | 16 | 0.7578 | 0.7586 | 8e-04  | 10000 | 10000 |
| CLP | 1 | 1 | 1.5  | 20 | 20 | 0.887  | 0.8849 | 0.0021 | 10000 | 10000 |
| CLP | 2 | 1 | 1.5  | 20 | 18 | 0.8432 | 0.8367 | 0.0065 | 10000 | 10000 |
| CLP | 3 | 1 | 1.5  | 20 | 16 | 0.7854 | 0.781  | 0.0044 | 10000 | 10000 |
| CLP | 1 | 1 | 1.55 | 20 | 20 | 0.9059 | 0.9006 | 0.0053 | 10000 | 10000 |
| CLP | 2 | 1 | 1.55 | 20 | 18 | 0.8657 | 0.8684 | 0.0027 | 10000 | 10000 |
| CLP | 3 | 1 | 1.55 | 20 | 16 | 0.811  | 0.8088 | 0.0022 | 10000 | 10000 |
| CLP | 1 | 1 | 1.6  | 20 | 20 | 0.9224 | 0.9256 | 0.0032 | 10000 | 10000 |
| CLP | 2 | 1 | 1.6  | 20 | 18 | 0.8859 | 0.8819 | 0.004  | 10000 | 10000 |

|     |   |   |      |    |    |        |        |        |       |       |
|-----|---|---|------|----|----|--------|--------|--------|-------|-------|
| CLP | 3 | 1 | 1.6  | 20 | 16 | 0.8347 | 0.8296 | 0.0051 | 10000 | 10000 |
| CLP | 1 | 1 | 1.65 | 20 | 20 | 0.9366 | 0.9318 | 0.0048 | 10000 | 10000 |
| CLP | 2 | 1 | 1.65 | 20 | 18 | 0.9038 | 0.9016 | 0.0022 | 10000 | 10000 |
| CLP | 3 | 1 | 1.65 | 20 | 16 | 0.8564 | 0.8525 | 0.0039 | 10000 | 10000 |
| CLP | 1 | 1 | 1.7  | 20 | 20 | 0.9486 | 0.9492 | 6e-04  | 10000 | 10000 |
| CLP | 2 | 1 | 1.7  | 20 | 18 | 0.9195 | 0.9197 | 2e-04  | 10000 | 10000 |
| CLP | 3 | 1 | 1.7  | 20 | 16 | 0.876  | 0.8696 | 0.0064 | 10000 | 10000 |
| CLP | 1 | 1 | 1.75 | 20 | 20 | 0.9588 | 0.9595 | 7e-04  | 10000 | 10000 |
| CLP | 2 | 1 | 1.75 | 20 | 18 | 0.9332 | 0.9319 | 0.0013 | 10000 | 10000 |
| CLP | 3 | 1 | 1.75 | 20 | 16 | 0.8937 | 0.8952 | 0.0015 | 10000 | 10000 |
| CLP | 1 | 1 | 1.8  | 20 | 20 | 0.9673 | 0.965  | 0.0023 | 10000 | 10000 |
| CLP | 2 | 1 | 1.8  | 20 | 18 | 0.9451 | 0.9418 | 0.0033 | 10000 | 10000 |
| CLP | 3 | 1 | 1.8  | 20 | 16 | 0.9095 | 0.9065 | 0.003  | 10000 | 10000 |
| CLP | 1 | 1 | 1.85 | 20 | 20 | 0.9743 | 0.9733 | 0.001  | 10000 | 10000 |
| CLP | 2 | 1 | 1.85 | 20 | 18 | 0.9552 | 0.9552 | 0      | 10000 | 10000 |
| CLP | 3 | 1 | 1.85 | 20 | 16 | 0.9234 | 0.9168 | 0.0066 | 10000 | 10000 |
| CLP | 1 | 1 | 1.9  | 20 | 20 | 0.9799 | 0.9795 | 4e-04  | 10000 | 10000 |
| CLP | 2 | 1 | 1.9  | 20 | 18 | 0.9637 | 0.9634 | 3e-04  | 10000 | 10000 |
| CLP | 3 | 1 | 1.9  | 20 | 16 | 0.9357 | 0.9325 | 0.0032 | 10000 | 10000 |
| CLP | 1 | 1 | 1.95 | 20 | 20 | 0.9845 | 0.9855 | 0.001  | 10000 | 10000 |
| CLP | 2 | 1 | 1.95 | 20 | 18 | 0.9709 | 0.969  | 0.0019 | 10000 | 10000 |
| CLP | 3 | 1 | 1.95 | 20 | 16 | 0.9464 | 0.9438 | 0.0026 | 10000 | 10000 |
| CLP | 1 | 1 | 2    | 20 | 20 | 0.9882 | 0.9888 | 6e-04  | 10000 | 10000 |
| CLP | 2 | 1 | 2    | 20 | 18 | 0.9768 | 0.9742 | 0.0026 | 10000 | 10000 |
| CLP | 3 | 1 | 2    | 20 | 16 | 0.9556 | 0.95   | 0.0056 | 10000 | 10000 |
| CLP | 1 | 1 | 2.05 | 20 | 20 | 0.9911 | 0.9913 | 2e-04  | 10000 | 10000 |
| CLP | 2 | 1 | 2.05 | 20 | 18 | 0.9817 | 0.9824 | 7e-04  | 10000 | 10000 |
| CLP | 3 | 1 | 2.05 | 20 | 16 | 0.9635 | 0.9607 | 0.0028 | 10000 | 10000 |
| CLP | 1 | 1 | 2.1  | 20 | 20 | 0.9933 | 0.9919 | 0.0014 | 10000 | 10000 |
| CLP | 2 | 1 | 2.1  | 20 | 18 | 0.9857 | 0.9837 | 0.002  | 10000 | 10000 |
| CLP | 3 | 1 | 2.1  | 20 | 16 | 0.9702 | 0.9676 | 0.0026 | 10000 | 10000 |
| CLP | 1 | 1 | 2.15 | 20 | 20 | 0.995  | 0.9958 | 8e-04  | 10000 | 10000 |
| CLP | 2 | 1 | 2.15 | 20 | 18 | 0.9889 | 0.9887 | 2e-04  | 10000 | 10000 |
| CLP | 3 | 1 | 2.15 | 20 | 16 | 0.9758 | 0.9735 | 0.0023 | 10000 | 10000 |
| CLP | 1 | 1 | 2.2  | 20 | 20 | 0.9964 | 0.9961 | 3e-04  | 10000 | 10000 |
| CLP | 2 | 1 | 2.2  | 20 | 18 | 0.9915 | 0.9917 | 2e-04  | 10000 | 10000 |
| CLP | 3 | 1 | 2.2  | 20 | 16 | 0.9806 | 0.9791 | 0.0015 | 10000 | 10000 |
| CLP | 1 | 1 | 2.25 | 20 | 20 | 0.9974 | 0.9968 | 6e-04  | 10000 | 10000 |
| CLP | 2 | 1 | 2.25 | 20 | 18 | 0.9935 | 0.993  | 5e-04  | 10000 | 10000 |
| CLP | 3 | 1 | 2.25 | 20 | 16 | 0.9845 | 0.9791 | 0.0054 | 10000 | 10000 |
| CLP | 1 | 1 | 2.3  | 20 | 20 | 0.9981 | 0.9989 | 8e-04  | 10000 | 10000 |
| CLP | 2 | 1 | 2.3  | 20 | 18 | 0.9951 | 0.9937 | 0.0014 | 10000 | 10000 |
| CLP | 3 | 1 | 2.3  | 20 | 16 | 0.9877 | 0.9832 | 0.0045 | 10000 | 10000 |
| CLP | 1 | 1 | 2.35 | 20 | 20 | 0.9986 | 0.998  | 6e-04  | 10000 | 10000 |
| CLP | 2 | 1 | 2.35 | 20 | 18 | 0.9963 | 0.9949 | 0.0014 | 10000 | 10000 |



|     |   |      |      |    |    |        |        |        |       |       |
|-----|---|------|------|----|----|--------|--------|--------|-------|-------|
| CLP | 3 | 1    | 2.35 | 20 | 16 | 0.9903 | 0.9886 | 0.0017 | 10000 | 10000 |
| CLP | 1 | 1    | 2.4  | 20 | 20 | 0.999  | 0.9983 | 7e-04  | 10000 | 10000 |
| CLP | 2 | 1    | 2.4  | 20 | 18 | 0.9973 | 0.9961 | 0.0012 | 10000 | 10000 |
| CLP | 3 | 1    | 2.4  | 20 | 16 | 0.9924 | 0.9897 | 0.0027 | 10000 | 10000 |
| CLP | 1 | 1    | 2.45 | 20 | 20 | 0.9993 | 0.9997 | 4e-04  | 10000 | 10000 |
| CLP | 2 | 1    | 2.45 | 20 | 18 | 0.998  | 0.9971 | 9e-04  | 10000 | 10000 |
| CLP | 3 | 1    | 2.45 | 20 | 16 | 0.9941 | 0.9904 | 0.0037 | 10000 | 10000 |
| CLP | 1 | 1    | 2.5  | 20 | 20 | 0.9995 | 0.9994 | 1e-04  | 10000 | 10000 |
| CLP | 2 | 1    | 2.5  | 20 | 18 | 0.9985 | 0.9976 | 9e-04  | 10000 | 10000 |
| CLP | 3 | 1    | 2.5  | 20 | 16 | 0.9955 | 0.9923 | 0.0032 | 10000 | 10000 |
| CLP | 1 | 2.05 | 0    | 20 | 20 | 0.05   | 0.0489 | 0.0011 | 10000 | 10000 |
| CLP | 2 | 2.05 | 0    | 20 | 18 | 0.05   | 0.0499 | 1e-04  | 10000 | 10000 |
| CLP | 3 | 2.05 | 0    | 20 | 16 | 0.05   | 0.0501 | 1e-04  | 10000 | 10000 |
| CLP | 1 | 2.05 | 0.05 | 20 | 20 | 0.0506 | 0.05   | 6e-04  | 10000 | 10000 |
| CLP | 2 | 2.05 | 0.05 | 20 | 18 | 0.0506 | 0.0533 | 0.0027 | 10000 | 10000 |
| CLP | 3 | 2.05 | 0.05 | 20 | 16 | 0.0505 | 0.048  | 0.0025 | 10000 | 10000 |
| CLP | 1 | 2.05 | 0.1  | 20 | 20 | 0.0525 | 0.0519 | 6e-04  | 10000 | 10000 |
| CLP | 2 | 2.05 | 0.1  | 20 | 18 | 0.0522 | 0.0507 | 0.0015 | 10000 | 10000 |
| CLP | 3 | 2.05 | 0.1  | 20 | 16 | 0.0519 | 0.0526 | 7e-04  | 10000 | 10000 |
| CLP | 1 | 2.05 | 0.15 | 20 | 20 | 0.0557 | 0.0592 | 0.0035 | 10000 | 10000 |
| CLP | 2 | 2.05 | 0.15 | 20 | 18 | 0.055  | 0.0525 | 0.0025 | 10000 | 10000 |
| CLP | 3 | 2.05 | 0.15 | 20 | 16 | 0.0543 | 0.0562 | 0.0019 | 10000 | 10000 |
| CLP | 1 | 2.05 | 0.2  | 20 | 20 | 0.0601 | 0.0593 | 8e-04  | 10000 | 10000 |
| CLP | 2 | 2.05 | 0.2  | 20 | 18 | 0.0589 | 0.0581 | 8e-04  | 10000 | 10000 |
| CLP | 3 | 2.05 | 0.2  | 20 | 16 | 0.0576 | 0.0557 | 0.0019 | 10000 | 10000 |
| CLP | 1 | 2.05 | 0.25 | 20 | 20 | 0.0658 | 0.0649 | 9e-04  | 10000 | 10000 |
| CLP | 2 | 2.05 | 0.25 | 20 | 18 | 0.0639 | 0.0601 | 0.0038 | 10000 | 10000 |
| CLP | 3 | 2.05 | 0.25 | 20 | 16 | 0.0619 | 0.0605 | 0.0014 | 10000 | 10000 |
| CLP | 1 | 2.05 | 0.3  | 20 | 20 | 0.0729 | 0.0771 | 0.0042 | 10000 | 10000 |
| CLP | 2 | 2.05 | 0.3  | 20 | 18 | 0.07   | 0.0685 | 0.0015 | 10000 | 10000 |
| CLP | 3 | 2.05 | 0.3  | 20 | 16 | 0.0672 | 0.0617 | 0.0055 | 10000 | 10000 |
| CLP | 1 | 2.05 | 0.35 | 20 | 20 | 0.0813 | 0.0861 | 0.0048 | 10000 | 10000 |
| CLP | 2 | 2.05 | 0.35 | 20 | 18 | 0.0774 | 0.0807 | 0.0033 | 10000 | 10000 |
| CLP | 3 | 2.05 | 0.35 | 20 | 16 | 0.0735 | 0.075  | 0.0015 | 10000 | 10000 |
| CLP | 1 | 2.05 | 0.4  | 20 | 20 | 0.091  | 0.0905 | 5e-04  | 10000 | 10000 |
| CLP | 2 | 2.05 | 0.4  | 20 | 18 | 0.0859 | 0.0849 | 0.001  | 10000 | 10000 |
| CLP | 3 | 2.05 | 0.4  | 20 | 16 | 0.0808 | 0.0811 | 3e-04  | 10000 | 10000 |
| CLP | 1 | 2.05 | 0.45 | 20 | 20 | 0.1022 | 0.0992 | 0.003  | 10000 | 10000 |
| CLP | 2 | 2.05 | 0.45 | 20 | 18 | 0.0956 | 0.0955 | 1e-04  | 10000 | 10000 |
| CLP | 3 | 2.05 | 0.45 | 20 | 16 | 0.0891 | 0.0925 | 0.0034 | 10000 | 10000 |
| CLP | 1 | 2.05 | 0.5  | 20 | 20 | 0.1147 | 0.1126 | 0.0021 | 10000 | 10000 |
| CLP | 2 | 2.05 | 0.5  | 20 | 18 | 0.1066 | 0.107  | 4e-04  | 10000 | 10000 |
| CLP | 3 | 2.05 | 0.5  | 20 | 16 | 0.0985 | 0.0945 | 0.004  | 10000 | 10000 |
| CLP | 1 | 2.05 | 0.55 | 20 | 20 | 0.1286 | 0.1271 | 0.0015 | 10000 | 10000 |
| CLP | 2 | 2.05 | 0.55 | 20 | 18 | 0.1187 | 0.118  | 7e-04  | 10000 | 10000 |

|     |   |      |      |    |    |        |        |        |       |       |
|-----|---|------|------|----|----|--------|--------|--------|-------|-------|
| CLP | 3 | 2.05 | 0.55 | 20 | 16 | 0.1089 | 0.101  | 0.0079 | 10000 | 10000 |
| CLP | 1 | 2.05 | 0.6  | 20 | 20 | 0.144  | 0.145  | 0.001  | 10000 | 10000 |
| CLP | 2 | 2.05 | 0.6  | 20 | 18 | 0.1322 | 0.1303 | 0.0019 | 10000 | 10000 |
| CLP | 3 | 2.05 | 0.6  | 20 | 16 | 0.1204 | 0.1269 | 0.0065 | 10000 | 10000 |
| CLP | 1 | 2.05 | 0.65 | 20 | 20 | 0.1608 | 0.1592 | 0.0016 | 10000 | 10000 |
| CLP | 2 | 2.05 | 0.65 | 20 | 18 | 0.1468 | 0.1525 | 0.0057 | 10000 | 10000 |
| CLP | 3 | 2.05 | 0.65 | 20 | 16 | 0.1329 | 0.134  | 0.0011 | 10000 | 10000 |
| CLP | 1 | 2.05 | 0.7  | 20 | 20 | 0.179  | 0.1748 | 0.0042 | 10000 | 10000 |
| CLP | 2 | 2.05 | 0.7  | 20 | 18 | 0.1627 | 0.1604 | 0.0023 | 10000 | 10000 |
| CLP | 3 | 2.05 | 0.7  | 20 | 16 | 0.1465 | 0.1527 | 0.0062 | 10000 | 10000 |
| CLP | 1 | 2.05 | 0.75 | 20 | 20 | 0.1986 | 0.1978 | 8e-04  | 10000 | 10000 |
| CLP | 2 | 2.05 | 0.75 | 20 | 18 | 0.1799 | 0.1773 | 0.0026 | 10000 | 10000 |
| CLP | 3 | 2.05 | 0.75 | 20 | 16 | 0.1612 | 0.1606 | 6e-04  | 10000 | 10000 |
| CLP | 1 | 2.05 | 0.8  | 20 | 20 | 0.2195 | 0.219  | 5e-04  | 10000 | 10000 |
| CLP | 2 | 2.05 | 0.8  | 20 | 18 | 0.1982 | 0.2083 | 0.0101 | 10000 | 10000 |
| CLP | 3 | 2.05 | 0.8  | 20 | 16 | 0.177  | 0.1748 | 0.0022 | 10000 | 10000 |
| CLP | 1 | 2.05 | 0.85 | 20 | 20 | 0.2418 | 0.2341 | 0.0077 | 10000 | 10000 |
| CLP | 2 | 2.05 | 0.85 | 20 | 18 | 0.2178 | 0.2147 | 0.0031 | 10000 | 10000 |
| CLP | 3 | 2.05 | 0.85 | 20 | 16 | 0.1937 | 0.1977 | 0.004  | 10000 | 10000 |
| CLP | 1 | 2.05 | 0.9  | 20 | 20 | 0.2652 | 0.261  | 0.0042 | 10000 | 10000 |
| CLP | 2 | 2.05 | 0.9  | 20 | 18 | 0.2384 | 0.2375 | 9e-04  | 10000 | 10000 |
| CLP | 3 | 2.05 | 0.9  | 20 | 16 | 0.2115 | 0.2147 | 0.0032 | 10000 | 10000 |
| CLP | 1 | 2.05 | 0.95 | 20 | 20 | 0.2898 | 0.2981 | 0.0083 | 10000 | 10000 |
| CLP | 2 | 2.05 | 0.95 | 20 | 18 | 0.2602 | 0.2602 | 0      | 10000 | 10000 |
| CLP | 3 | 2.05 | 0.95 | 20 | 16 | 0.2303 | 0.2341 | 0.0038 | 10000 | 10000 |
| CLP | 1 | 2.05 | 1    | 20 | 20 | 0.3155 | 0.3168 | 0.0013 | 10000 | 10000 |
| CLP | 2 | 2.05 | 1    | 20 | 18 | 0.283  | 0.2744 | 0.0086 | 10000 | 10000 |
| CLP | 3 | 2.05 | 1    | 20 | 16 | 0.2501 | 0.2542 | 0.0041 | 10000 | 10000 |
| CLP | 1 | 2.05 | 1.05 | 20 | 20 | 0.3421 | 0.3426 | 5e-04  | 10000 | 10000 |
| CLP | 2 | 2.05 | 1.05 | 20 | 18 | 0.3067 | 0.3045 | 0.0022 | 10000 | 10000 |
| CLP | 3 | 2.05 | 1.05 | 20 | 16 | 0.2707 | 0.2714 | 7e-04  | 10000 | 10000 |
| CLP | 1 | 2.05 | 1.1  | 20 | 20 | 0.3695 | 0.3759 | 0.0064 | 10000 | 10000 |
| CLP | 2 | 2.05 | 1.1  | 20 | 18 | 0.3313 | 0.332  | 7e-04  | 10000 | 10000 |
| CLP | 3 | 2.05 | 1.1  | 20 | 16 | 0.2922 | 0.2895 | 0.0027 | 10000 | 10000 |
| CLP | 1 | 2.05 | 1.15 | 20 | 20 | 0.3977 | 0.4001 | 0.0024 | 10000 | 10000 |
| CLP | 2 | 2.05 | 1.15 | 20 | 18 | 0.3566 | 0.3653 | 0.0087 | 10000 | 10000 |
| CLP | 3 | 2.05 | 1.15 | 20 | 16 | 0.3145 | 0.3236 | 0.0091 | 10000 | 10000 |
| CLP | 1 | 2.05 | 1.2  | 20 | 20 | 0.4263 | 0.4297 | 0.0034 | 10000 | 10000 |
| CLP | 2 | 2.05 | 1.2  | 20 | 18 | 0.3826 | 0.3854 | 0.0028 | 10000 | 10000 |
| CLP | 3 | 2.05 | 1.2  | 20 | 16 | 0.3375 | 0.334  | 0.0035 | 10000 | 10000 |
| CLP | 1 | 2.05 | 1.25 | 20 | 20 | 0.4554 | 0.456  | 6e-04  | 10000 | 10000 |
| CLP | 2 | 2.05 | 1.25 | 20 | 18 | 0.4092 | 0.4022 | 0.007  | 10000 | 10000 |
| CLP | 3 | 2.05 | 1.25 | 20 | 16 | 0.3611 | 0.3666 | 0.0055 | 10000 | 10000 |
| CLP | 1 | 2.05 | 1.3  | 20 | 20 | 0.4847 | 0.4805 | 0.0042 | 10000 | 10000 |
| CLP | 2 | 2.05 | 1.3  | 20 | 18 | 0.4362 | 0.4452 | 0.009  | 10000 | 10000 |

|     |   |      |      |    |    |        |        |        |       |       |
|-----|---|------|------|----|----|--------|--------|--------|-------|-------|
| CLP | 3 | 2.05 | 1.3  | 20 | 16 | 0.3853 | 0.3947 | 0.0094 | 10000 | 10000 |
| CLP | 1 | 2.05 | 1.35 | 20 | 20 | 0.5142 | 0.5044 | 0.0098 | 10000 | 10000 |
| CLP | 2 | 2.05 | 1.35 | 20 | 18 | 0.4635 | 0.4657 | 0.0022 | 10000 | 10000 |
| CLP | 3 | 2.05 | 1.35 | 20 | 16 | 0.4099 | 0.4093 | 6e-04  | 10000 | 10000 |
| CLP | 1 | 2.05 | 1.4  | 20 | 20 | 0.5435 | 0.5406 | 0.0029 | 10000 | 10000 |
| CLP | 2 | 2.05 | 1.4  | 20 | 18 | 0.491  | 0.4958 | 0.0048 | 10000 | 10000 |
| CLP | 3 | 2.05 | 1.4  | 20 | 16 | 0.4349 | 0.447  | 0.0121 | 10000 | 10000 |
| CLP | 1 | 2.05 | 1.45 | 20 | 20 | 0.5726 | 0.5668 | 0.0058 | 10000 | 10000 |
| CLP | 2 | 2.05 | 1.45 | 20 | 18 | 0.5185 | 0.5221 | 0.0036 | 10000 | 10000 |
| CLP | 3 | 2.05 | 1.45 | 20 | 16 | 0.4602 | 0.4692 | 0.009  | 10000 | 10000 |
| CLP | 1 | 2.05 | 1.5  | 20 | 20 | 0.6013 | 0.6017 | 4e-04  | 10000 | 10000 |
| CLP | 2 | 2.05 | 1.5  | 20 | 18 | 0.5459 | 0.554  | 0.0081 | 10000 | 10000 |
| CLP | 3 | 2.05 | 1.5  | 20 | 16 | 0.4856 | 0.4894 | 0.0038 | 10000 | 10000 |
| CLP | 1 | 2.05 | 1.55 | 20 | 20 | 0.6294 | 0.6254 | 0.004  | 10000 | 10000 |
| CLP | 2 | 2.05 | 1.55 | 20 | 18 | 0.5731 | 0.5716 | 0.0015 | 10000 | 10000 |
| CLP | 3 | 2.05 | 1.55 | 20 | 16 | 0.5111 | 0.5102 | 9e-04  | 10000 | 10000 |
| CLP | 1 | 2.05 | 1.6  | 20 | 20 | 0.6569 | 0.6541 | 0.0028 | 10000 | 10000 |
| CLP | 2 | 2.05 | 1.6  | 20 | 18 | 0.5999 | 0.6033 | 0.0034 | 10000 | 10000 |
| CLP | 3 | 2.05 | 1.6  | 20 | 16 | 0.5365 | 0.5383 | 0.0018 | 10000 | 10000 |
| CLP | 1 | 2.05 | 1.65 | 20 | 20 | 0.6836 | 0.6757 | 0.0079 | 10000 | 10000 |
| CLP | 2 | 2.05 | 1.65 | 20 | 18 | 0.6263 | 0.627  | 7e-04  | 10000 | 10000 |
| CLP | 3 | 2.05 | 1.65 | 20 | 16 | 0.5618 | 0.5636 | 0.0018 | 10000 | 10000 |
| CLP | 1 | 2.05 | 1.7  | 20 | 20 | 0.7093 | 0.713  | 0.0037 | 10000 | 10000 |
| CLP | 2 | 2.05 | 1.7  | 20 | 18 | 0.6521 | 0.6422 | 0.0099 | 10000 | 10000 |
| CLP | 3 | 2.05 | 1.7  | 20 | 16 | 0.5868 | 0.5901 | 0.0033 | 10000 | 10000 |
| CLP | 1 | 2.05 | 1.75 | 20 | 20 | 0.734  | 0.7352 | 0.0012 | 10000 | 10000 |
| CLP | 2 | 2.05 | 1.75 | 20 | 18 | 0.6773 | 0.6776 | 3e-04  | 10000 | 10000 |
| CLP | 3 | 2.05 | 1.75 | 20 | 16 | 0.6115 | 0.6169 | 0.0054 | 10000 | 10000 |
| CLP | 1 | 2.05 | 1.8  | 20 | 20 | 0.7576 | 0.7561 | 0.0015 | 10000 | 10000 |
| CLP | 2 | 2.05 | 1.8  | 20 | 18 | 0.7016 | 0.7068 | 0.0052 | 10000 | 10000 |
| CLP | 3 | 2.05 | 1.8  | 20 | 16 | 0.6357 | 0.6329 | 0.0028 | 10000 | 10000 |
| CLP | 1 | 2.05 | 1.85 | 20 | 20 | 0.78   | 0.7882 | 0.0082 | 10000 | 10000 |
| CLP | 2 | 2.05 | 1.85 | 20 | 18 | 0.725  | 0.7242 | 8e-04  | 10000 | 10000 |
| CLP | 3 | 2.05 | 1.85 | 20 | 16 | 0.6594 | 0.6624 | 0.003  | 10000 | 10000 |
| CLP | 1 | 2.05 | 1.9  | 20 | 20 | 0.8012 | 0.7963 | 0.0049 | 10000 | 10000 |
| CLP | 2 | 2.05 | 1.9  | 20 | 18 | 0.7475 | 0.743  | 0.0045 | 10000 | 10000 |
| CLP | 3 | 2.05 | 1.9  | 20 | 16 | 0.6825 | 0.6807 | 0.0018 | 10000 | 10000 |
| CLP | 1 | 2.05 | 1.95 | 20 | 20 | 0.8211 | 0.8223 | 0.0012 | 10000 | 10000 |
| CLP | 2 | 2.05 | 1.95 | 20 | 18 | 0.769  | 0.7724 | 0.0034 | 10000 | 10000 |
| CLP | 3 | 2.05 | 1.95 | 20 | 16 | 0.7049 | 0.7052 | 3e-04  | 10000 | 10000 |
| CLP | 1 | 2.05 | 2    | 20 | 20 | 0.8397 | 0.841  | 0.0013 | 10000 | 10000 |
| CLP | 2 | 2.05 | 2    | 20 | 18 | 0.7894 | 0.7888 | 6e-04  | 10000 | 10000 |
| CLP | 3 | 2.05 | 2    | 20 | 16 | 0.7265 | 0.7281 | 0.0016 | 10000 | 10000 |
| CLP | 1 | 2.05 | 2.05 | 20 | 20 | 0.857  | 0.8673 | 0.0103 | 10000 | 10000 |
| CLP | 2 | 2.05 | 2.05 | 20 | 18 | 0.8088 | 0.8164 | 0.0076 | 10000 | 10000 |

|     |   |      |      |    |    |        |        |        |       |       |
|-----|---|------|------|----|----|--------|--------|--------|-------|-------|
| CLP | 3 | 2.05 | 2.05 | 20 | 16 | 0.7473 | 0.7457 | 0.0016 | 10000 | 10000 |
| CLP | 1 | 2.05 | 2.1  | 20 | 20 | 0.8729 | 0.8754 | 0.0025 | 10000 | 10000 |
| CLP | 2 | 2.05 | 2.1  | 20 | 18 | 0.827  | 0.8306 | 0.0036 | 10000 | 10000 |
| CLP | 3 | 2.05 | 2.1  | 20 | 16 | 0.7672 | 0.7631 | 0.0041 | 10000 | 10000 |
| CLP | 1 | 2.05 | 2.15 | 20 | 20 | 0.8876 | 0.8859 | 0.0017 | 10000 | 10000 |
| CLP | 2 | 2.05 | 2.15 | 20 | 18 | 0.844  | 0.8408 | 0.0032 | 10000 | 10000 |
| CLP | 3 | 2.05 | 2.15 | 20 | 16 | 0.7863 | 0.7834 | 0.0029 | 10000 | 10000 |
| CLP | 1 | 2.05 | 2.2  | 20 | 20 | 0.9011 | 0.9014 | 3e-04  | 10000 | 10000 |
| CLP | 2 | 2.05 | 2.2  | 20 | 18 | 0.8599 | 0.8614 | 0.0015 | 10000 | 10000 |
| CLP | 3 | 2.05 | 2.2  | 20 | 16 | 0.8043 | 0.8044 | 1e-04  | 10000 | 10000 |
| CLP | 1 | 2.05 | 2.25 | 20 | 20 | 0.9133 | 0.9139 | 6e-04  | 10000 | 10000 |
| CLP | 2 | 2.05 | 2.25 | 20 | 18 | 0.8746 | 0.8741 | 5e-04  | 10000 | 10000 |
| CLP | 3 | 2.05 | 2.25 | 20 | 16 | 0.8215 | 0.8206 | 9e-04  | 10000 | 10000 |
| CLP | 1 | 2.05 | 2.3  | 20 | 20 | 0.9243 | 0.9228 | 0.0015 | 10000 | 10000 |
| CLP | 2 | 2.05 | 2.3  | 20 | 18 | 0.8883 | 0.8804 | 0.0079 | 10000 | 10000 |
| CLP | 3 | 2.05 | 2.3  | 20 | 16 | 0.8376 | 0.8345 | 0.0031 | 10000 | 10000 |
| CLP | 1 | 2.05 | 2.35 | 20 | 20 | 0.9342 | 0.9327 | 0.0015 | 10000 | 10000 |
| CLP | 2 | 2.05 | 2.35 | 20 | 18 | 0.9008 | 0.895  | 0.0058 | 10000 | 10000 |
| CLP | 3 | 2.05 | 2.35 | 20 | 16 | 0.8527 | 0.8482 | 0.0045 | 10000 | 10000 |
| CLP | 1 | 2.05 | 2.4  | 20 | 20 | 0.9431 | 0.943  | 1e-04  | 10000 | 10000 |
| CLP | 2 | 2.05 | 2.4  | 20 | 18 | 0.9123 | 0.9078 | 0.0045 | 10000 | 10000 |
| CLP | 3 | 2.05 | 2.4  | 20 | 16 | 0.8669 | 0.8647 | 0.0022 | 10000 | 10000 |
| CLP | 1 | 2.05 | 2.45 | 20 | 20 | 0.9511 | 0.9542 | 0.0031 | 10000 | 10000 |
| CLP | 2 | 2.05 | 2.45 | 20 | 18 | 0.9227 | 0.9198 | 0.0029 | 10000 | 10000 |
| CLP | 3 | 2.05 | 2.45 | 20 | 16 | 0.8801 | 0.8694 | 0.0107 | 10000 | 10000 |
| CLP | 1 | 2.05 | 2.5  | 20 | 20 | 0.9581 | 0.9554 | 0.0027 | 10000 | 10000 |
| CLP | 2 | 2.05 | 2.5  | 20 | 18 | 0.9322 | 0.9336 | 0.0014 | 10000 | 10000 |
| CLP | 3 | 2.05 | 2.5  | 20 | 16 | 0.8924 | 0.8924 | 0      | 10000 | 10000 |
