# Supplementary material
Source: publisher figshare collection journal article supplement (https://tandf.figshare.com/articles/dataset/_/14374261)
Supplement: Supplementary file 3 [file 1]

# Scenario 4 Validation Results: Difference-in-Difference Hypothesis

*Kevin P. Josey*

*December 20, 2017*

## 1 Study Design

Scenario 4 emulates a balanced, four-sample design with three repeated measurements collected over time. We approximate the power for a general linear hypothesis test of the group by time interaction. A compound symmetric covariance model is specified for the simulation of the outcome variables. This scenario aims to demonstrate the validity of our methodology when assumptions of sphericity are unlikely to hold. Several conditional linear missing data processes and Markov missing data processes are considered.

### 1.1 Linear Mixed Model Inputs

#### 1.1.1 Type I Error Rates ( $\alpha$ )

0.0100

#### 1.1.2 Beta Scale Values ( $\delta_\beta$ )

0.0000, 0.5000, 1.0000, 1.5000, 2.0000

#### 1.1.3 Sigma Scale Values ( $\delta_\sigma$ )

1.0000, 2.0000

#### 1.1.4 Planned Sample Sizes ( $N$ )

10, 20

#### 1.1.5 Matrix Inputs

$$Es(\mathbf{X}_M) = \begin{bmatrix} 1.0000 & 0.0000 & 0.0000 & 0.0000 \\ 0.0000 & 1.0000 & 0.0000 & 0.0000 \\ 0.0000 & 0.0000 & 1.0000 & 0.0000 \\ 0.0000 & 0.0000 & 0.0000 & 1.0000 \end{bmatrix}$$

$$\beta = \begin{bmatrix} 1.0000 \\ 0.0000 \\ 0.0000 \\ 0.0000 \\ 0.0000 \\ 0.0000 \\ 0.0000 \\ 0.0000 \\ 0.0000 \\ 0.0000 \\ 0.0000 \\ 0.0000 \end{bmatrix}$$

$$\mathbf{L} = \begin{bmatrix} 1 & -1 & 0 & -1 & 1 & 0 & 0 & 0 & 0 & 0 & 0 \\ 1 & 0 & -1 & -1 & 0 & 1 & 0 & 0 & 0 & 0 & 0 \\ 1 & -1 & 0 & 0 & 0 & 0 & -1 & 1 & 0 & 0 & 0 \\ 1 & 0 & -1 & 0 & 0 & 0 & -1 & 0 & 1 & 0 & 0 \\ 1 & -1 & 0 & 0 & 0 & 0 & 0 & 0 & 0 & -1 & 1 \\ 1 & 0 & -1 & 0 & 0 & 0 & 0 & 0 & 0 & -1 & 0 & 1 \end{bmatrix}$$

$$\boldsymbol{\theta}_0 = \begin{bmatrix} 0.0000 \\ 0.0000 \\ 0.0000 \\ 0.0000 \\ 0.0000 \\ 0.0000 \\ 0.0000 \end{bmatrix}$$

$$\boldsymbol{\Sigma}_M = \begin{bmatrix} 1.0000 & 0.4000 & 0.4000 \\ 0.4000 & 1.0000 & 0.4000 \\ 0.4000 & 0.4000 & 1.0000 \end{bmatrix}$$

## 2 Conditional Linear Missing Data Models

| Pattern Index | $\pi$                    | $\gamma_{jj'}$ | Correlation Pattern |
|---------------|--------------------------|----------------|---------------------|
| 1             | (1.0000, 1.0000, 1.0000) | 0.25           | CS                  |
| 2             | (0.9000, 0.9000, 0.9000) | 0.25           | CS                  |
| 3             | (0.8000, 0.9000, 0.9000) | 0.25           | CS                  |
| 4             | (0.9000, 0.8000, 0.8000) | 0.25           | CS                  |
| 5             | (0.8000, 0.8000, 0.8000) | 0.25           | CS                  |

## 3 Validation Results

### 3.1 Summary Statistics

|                                                    |        |
|----------------------------------------------------|--------|
| Maximum Deviation from the Complete Case Scenarios | 0.0340 |
| Maximum Deviation from the Observed Case Scenarios | 0.0556 |

### 3.2 Full Validation Results

#### 3.2.1 Complete Case Analysis

| Missing Process | Pattern Index | $\delta_\sigma$ | $\delta_\beta$ | $N$ | $\mathcal{E}(N_c)$ | Analytical Power | Empirical Power | Absolute Deviation | Iterations | Converged |
|-----------------|---------------|-----------------|----------------|-----|--------------------|------------------|-----------------|--------------------|------------|-----------|
| CLP             | 1             | 1               | 0              | 20  | 20                 | 0.01             | 0.0108          | 8e-04              | 10000      | 10000     |
| CLP             | 2             | 1               | 0              | 20  | 15.4012            | 0.01             | 0.0096          | 4e-04              | 9968       | 9968      |
| CLP             | 3             | 1               | 0              | 20  | 13.875             | 0.01             | 0.0109          | 9e-04              | 9902       | 9899      |
| CLP             | 4             | 1               | 0              | 20  | 12.75              | 0.01             | 0.0109          | 9e-04              | 9751       | 9738      |
| CLP             | 5             | 1               | 0              | 20  | 11.56              | 0.01             | 0.0097          | 3e-04              | 9495       | 9447      |
| CLP             | 1             | 1               | 0.5            | 20  | 20                 | 0.0193           | 0.0206          | 0.0013             | 10000      | 10000     |

|     |   |   |     |    |         |        |        |        |       |       |
|-----|---|---|-----|----|---------|--------|--------|--------|-------|-------|
| CLP | 2 | 1 | 0.5 | 20 | 15.4012 | 0.0152 | 0.0137 | 0.0015 | 9978  | 9978  |
| CLP | 3 | 1 | 0.5 | 20 | 13.875  | 0.0141 | 0.0129 | 0.0012 | 9885  | 9879  |
| CLP | 4 | 1 | 0.5 | 20 | 12.75   | 0.0133 | 0.0128 | 4e-04  | 9765  | 9755  |
| CLP | 5 | 1 | 0.5 | 20 | 11.56   | 0.0125 | 0.0129 | 4e-04  | 9431  | 9383  |
| CLP | 1 | 1 | 1   | 20 | 20      | 0.066  | 0.0671 | 0.0011 | 10000 | 10000 |
| CLP | 2 | 1 | 1   | 20 | 15.4012 | 0.0375 | 0.0405 | 0.003  | 9977  | 9977  |
| CLP | 3 | 1 | 1   | 20 | 13.875  | 0.0302 | 0.0368 | 0.0065 | 9903  | 9899  |
| CLP | 4 | 1 | 1   | 20 | 12.75   | 0.0256 | 0.0279 | 0.0023 | 9759  | 9751  |
| CLP | 5 | 1 | 1   | 20 | 11.56   | 0.0213 | 0.0246 | 0.0033 | 9450  | 9401  |
| CLP | 1 | 1 | 1.5 | 20 | 20      | 0.2015 | 0.1978 | 0.0037 | 10000 | 10000 |
| CLP | 2 | 1 | 1.5 | 20 | 15.4012 | 0.0964 | 0.1097 | 0.0133 | 9972  | 9972  |
| CLP | 3 | 1 | 1.5 | 20 | 13.875  | 0.0705 | 0.0867 | 0.0162 | 9878  | 9877  |
| CLP | 4 | 1 | 1.5 | 20 | 12.75   | 0.0546 | 0.066  | 0.0114 | 9750  | 9733  |
| CLP | 5 | 1 | 1.5 | 20 | 11.56   | 0.0407 | 0.0525 | 0.0118 | 9498  | 9456  |
| CLP | 1 | 1 | 2   | 20 | 20      | 0.4506 | 0.444  | 0.0066 | 10000 | 10000 |
| CLP | 2 | 1 | 2   | 20 | 15.4012 | 0.2161 | 0.242  | 0.0259 | 9967  | 9967  |
| CLP | 3 | 1 | 2   | 20 | 13.875  | 0.1517 | 0.1801 | 0.0284 | 9886  | 9886  |
| CLP | 4 | 1 | 2   | 20 | 12.75   | 0.1117 | 0.1406 | 0.0289 | 9744  | 9736  |
| CLP | 5 | 1 | 2   | 20 | 11.56   | 0.0771 | 0.1098 | 0.0326 | 9482  | 9427  |
| CLP | 1 | 2 | 0   | 20 | 20      | 0.01   | 0.0078 | 0.0022 | 10000 | 10000 |
| CLP | 2 | 2 | 0   | 20 | 15.4012 | 0.01   | 0.0102 | 2e-04  | 9982  | 9982  |
| CLP | 3 | 2 | 0   | 20 | 13.875  | 0.01   | 0.0106 | 6e-04  | 9892  | 9891  |
| CLP | 4 | 2 | 0   | 20 | 12.75   | 0.01   | 0.012  | 0.002  | 9742  | 9734  |
| CLP | 5 | 2 | 0   | 20 | 11.56   | 0.01   | 0.0086 | 0.0014 | 9487  | 9442  |
| CLP | 1 | 2 | 0.5 | 20 | 20      | 0.0142 | 0.0156 | 0.0014 | 10000 | 10000 |
| CLP | 2 | 2 | 0.5 | 20 | 15.4012 | 0.0125 | 0.0117 | 8e-04  | 9973  | 9973  |
| CLP | 3 | 2 | 0.5 | 20 | 13.875  | 0.012  | 0.0107 | 0.0012 | 9898  | 9897  |
| CLP | 4 | 2 | 0.5 | 20 | 12.75   | 0.0116 | 0.0127 | 0.0012 | 9749  | 9738  |
| CLP | 5 | 2 | 0.5 | 20 | 11.56   | 0.0112 | 0.0109 | 3e-04  | 9464  | 9414  |
| CLP | 1 | 2 | 1   | 20 | 20      | 0.0316 | 0.0319 | 3e-04  | 10000 | 10000 |
| CLP | 2 | 2 | 1   | 20 | 15.4012 | 0.0216 | 0.0216 | 0      | 9972  | 9972  |
| CLP | 3 | 2 | 1   | 20 | 13.875  | 0.0188 | 0.0209 | 0.0021 | 9891  | 9890  |
| CLP | 4 | 2 | 1   | 20 | 12.75   | 0.0169 | 0.0193 | 0.0024 | 9736  | 9727  |
| CLP | 5 | 2 | 1   | 20 | 11.56   | 0.0152 | 0.0147 | 4e-04  | 9479  | 9431  |
| CLP | 1 | 2 | 1.5 | 20 | 20      | 0.0765 | 0.0789 | 0.0024 | 10000 | 10000 |
| CLP | 2 | 2 | 1.5 | 20 | 15.4012 | 0.0422 | 0.0481 | 0.0059 | 9966  | 9966  |
| CLP | 3 | 2 | 1.5 | 20 | 13.875  | 0.0335 | 0.0379 | 0.0044 | 9874  | 9872  |
| CLP | 4 | 2 | 1.5 | 20 | 12.75   | 0.028  | 0.031  | 0.003  | 9749  | 9742  |
| CLP | 5 | 2 | 1.5 | 20 | 11.56   | 0.023  | 0.0283 | 0.0053 | 9455  | 9397  |
| CLP | 1 | 2 | 2   | 20 | 20      | 0.1697 | 0.1669 | 0.0028 | 10000 | 10000 |
| CLP | 2 | 2 | 2   | 20 | 15.4012 | 0.0825 | 0.087  | 0.0044 | 9971  | 9971  |
| CLP | 3 | 2 | 2   | 20 | 13.875  | 0.0612 | 0.075  | 0.0139 | 9891  | 9887  |
| CLP | 4 | 2 | 2   | 20 | 12.75   | 0.048  | 0.059  | 0.0111 | 9765  | 9757  |
| CLP | 5 | 2 | 2   | 20 | 11.56   | 0.0363 | 0.0474 | 0.011  | 9488  | 9437  |
| CLP | 1 | 1 | 0   | 40 | 40      | 0.01   | 0.0118 | 0.0018 | 10000 | 10000 |

|     |   |   |     |    |         |        |        |        |       |       |
|-----|---|---|-----|----|---------|--------|--------|--------|-------|-------|
| CLP | 2 | 1 | 0   | 40 | 30.8025 | 0.01   | 0.0101 | 1e-04  | 10000 | 10000 |
| CLP | 3 | 1 | 0   | 40 | 27.75   | 0.01   | 0.0105 | 5e-04  | 10000 | 10000 |
| CLP | 4 | 1 | 0   | 40 | 25.5    | 0.01   | 0.0089 | 0.0011 | 9997  | 9997  |
| CLP | 5 | 1 | 0   | 40 | 23.12   | 0.01   | 0.0099 | 1e-04  | 9996  | 9996  |
| CLP | 1 | 1 | 0.5 | 40 | 40      | 0.0392 | 0.0395 | 3e-04  | 10000 | 10000 |
| CLP | 2 | 1 | 0.5 | 40 | 30.8025 | 0.0283 | 0.0293 | 0.001  | 10000 | 10000 |
| CLP | 3 | 1 | 0.5 | 40 | 27.75   | 0.0251 | 0.0258 | 7e-04  | 10000 | 10000 |
| CLP | 4 | 1 | 0.5 | 40 | 25.5    | 0.0229 | 0.0245 | 0.0016 | 9999  | 9999  |
| CLP | 5 | 1 | 0.5 | 40 | 23.12   | 0.0207 | 0.0243 | 0.0036 | 9994  | 9994  |
| CLP | 1 | 1 | 1   | 40 | 40      | 0.2415 | 0.2395 | 0.002  | 10000 | 10000 |
| CLP | 2 | 1 | 1   | 40 | 30.8025 | 0.1425 | 0.1452 | 0.0027 | 10000 | 10000 |
| CLP | 3 | 1 | 1   | 40 | 27.75   | 0.1145 | 0.1164 | 0.002  | 9999  | 9999  |
| CLP | 4 | 1 | 1   | 40 | 25.5    | 0.0957 | 0.1022 | 0.0065 | 9999  | 9999  |
| CLP | 5 | 1 | 1   | 40 | 23.12   | 0.0777 | 0.0811 | 0.0033 | 9993  | 9993  |
| CLP | 1 | 1 | 1.5 | 40 | 40      | 0.6833 | 0.6755 | 0.0078 | 10000 | 10000 |
| CLP | 2 | 1 | 1.5 | 40 | 30.8025 | 0.4543 | 0.4648 | 0.0105 | 10000 | 10000 |
| CLP | 3 | 1 | 1.5 | 40 | 27.75   | 0.3697 | 0.3884 | 0.0187 | 10000 | 10000 |
| CLP | 4 | 1 | 1.5 | 40 | 25.5    | 0.3078 | 0.3278 | 0.02   | 9998  | 9998  |
| CLP | 5 | 1 | 1.5 | 40 | 23.12   | 0.2448 | 0.2655 | 0.0207 | 9993  | 9993  |
| CLP | 1 | 1 | 2   | 40 | 40      | 0.9554 | 0.9525 | 0.0029 | 10000 | 10000 |
| CLP | 2 | 1 | 2   | 40 | 30.8025 | 0.8117 | 0.8016 | 0.0101 | 10000 | 10000 |
| CLP | 3 | 1 | 2   | 40 | 27.75   | 0.7197 | 0.7212 | 0.0015 | 10000 | 10000 |
| CLP | 4 | 1 | 2   | 40 | 25.5    | 0.6353 | 0.6435 | 0.0081 | 9999  | 9999  |
| CLP | 5 | 1 | 2   | 40 | 23.12   | 0.5329 | 0.5455 | 0.0126 | 9993  | 9993  |
| CLP | 1 | 2 | 0   | 40 | 40      | 0.01   | 0.0108 | 8e-04  | 10000 | 10000 |
| CLP | 2 | 2 | 0   | 40 | 30.8025 | 0.01   | 0.0106 | 6e-04  | 10000 | 10000 |
| CLP | 3 | 2 | 0   | 40 | 27.75   | 0.01   | 0.0113 | 0.0013 | 9999  | 9999  |
| CLP | 4 | 2 | 0   | 40 | 25.5    | 0.01   | 0.0087 | 0.0013 | 9998  | 9998  |
| CLP | 5 | 2 | 0   | 40 | 23.12   | 0.01   | 0.0083 | 0.0017 | 9991  | 9991  |
| CLP | 1 | 2 | 0.5 | 40 | 40      | 0.0221 | 0.0242 | 0.0021 | 10000 | 10000 |
| CLP | 2 | 2 | 0.5 | 40 | 30.8025 | 0.0179 | 0.019  | 0.0011 | 10000 | 10000 |
| CLP | 3 | 2 | 0.5 | 40 | 27.75   | 0.0167 | 0.016  | 7e-04  | 10000 | 10000 |
| CLP | 4 | 2 | 0.5 | 40 | 25.5    | 0.0158 | 0.0164 | 6e-04  | 9999  | 9999  |
| CLP | 5 | 2 | 0.5 | 40 | 23.12   | 0.0149 | 0.0149 | 0      | 9991  | 9991  |
| CLP | 1 | 2 | 1   | 40 | 40      | 0.0891 | 0.0869 | 0.0022 | 10000 | 10000 |
| CLP | 2 | 2 | 1   | 40 | 30.8025 | 0.0566 | 0.059  | 0.0024 | 10000 | 10000 |
| CLP | 3 | 2 | 1   | 40 | 27.75   | 0.0476 | 0.0533 | 0.0057 | 10000 | 10000 |
| CLP | 4 | 2 | 1   | 40 | 25.5    | 0.0415 | 0.0405 | 0.001  | 9997  | 9997  |
| CLP | 5 | 2 | 1   | 40 | 23.12   | 0.0356 | 0.0433 | 0.0078 | 9993  | 9993  |
| CLP | 1 | 2 | 1.5 | 40 | 40      | 0.2869 | 0.2912 | 0.0043 | 10000 | 10000 |
| CLP | 2 | 2 | 1.5 | 40 | 30.8025 | 0.1692 | 0.1789 | 0.0097 | 10000 | 10000 |
| CLP | 3 | 2 | 1.5 | 40 | 27.75   | 0.1354 | 0.1482 | 0.0128 | 10000 | 10000 |
| CLP | 4 | 2 | 1.5 | 40 | 25.5    | 0.1126 | 0.1295 | 0.0169 | 10000 | 10000 |
| CLP | 5 | 2 | 1.5 | 40 | 23.12   | 0.0908 | 0.1034 | 0.0126 | 9993  | 9993  |
| CLP | 1 | 2 | 2   | 40 | 40      | 0.6066 | 0.6122 | 0.0056 | 10000 | 10000 |

|     |   |   |   |    |         |        |        |        |       |       |
|-----|---|---|---|----|---------|--------|--------|--------|-------|-------|
| CLP | 2 | 2 | 2 | 40 | 30.8025 | 0.3887 | 0.3984 | 0.0097 | 10000 | 10000 |
| CLP | 3 | 2 | 2 | 40 | 27.75   | 0.3134 | 0.3335 | 0.0201 | 10000 | 10000 |
| CLP | 4 | 2 | 2 | 40 | 25.5    | 0.2597 | 0.2832 | 0.0236 | 9999  | 9999  |
| CLP | 5 | 2 | 2 | 40 | 23.12   | 0.2061 | 0.2326 | 0.0266 | 9994  | 9994  |

### 3.2.2 Observed Case Analysis

| Missing Process | Pattern Index | $\delta_\sigma$ | $\delta_\beta$ | $N$ | $\mathcal{E}(N_m)$ | Analytical Power | Empirical Power | Absolute Deviation | Iterations | Converged |
|-----------------|---------------|-----------------|----------------|-----|--------------------|------------------|-----------------|--------------------|------------|-----------|
| CLP             | 1             | 1               | 0              | 20  | 20                 | 0.01             | 0.0108          | 8e-04              | 10000      | 10000     |
| CLP             | 2             | 1               | 0              | 20  | 18                 | 0.01             | 0.013           | 0.003              | 9998       | 9998      |
| CLP             | 3             | 1               | 0              | 20  | 17.3333            | 0.01             | 0.0159          | 0.0059             | 9983       | 9981      |
| CLP             | 4             | 1               | 0              | 20  | 16.6667            | 0.01             | 0.0158          | 0.0058             | 9979       | 9972      |
| CLP             | 5             | 1               | 0              | 20  | 16                 | 0.01             | 0.0205          | 0.0105             | 9962       | 9922      |
| CLP             | 1             | 1               | 0.5            | 20  | 20                 | 0.0193           | 0.0206          | 0.0013             | 10000      | 10000     |
| CLP             | 2             | 1               | 0.5            | 20  | 18                 | 0.0174           | 0.0191          | 0.0017             | 9997       | 9997      |
| CLP             | 3             | 1               | 0.5            | 20  | 17.3333            | 0.0168           | 0.0219          | 0.0051             | 9982       | 9981      |
| CLP             | 4             | 1               | 0.5            | 20  | 16.6667            | 0.0163           | 0.0216          | 0.0053             | 9981       | 9972      |
| CLP             | 5             | 1               | 0.5            | 20  | 16                 | 0.0157           | 0.0289          | 0.0132             | 9975       | 9937      |
| CLP             | 1             | 1               | 1              | 20  | 20                 | 0.066            | 0.0671          | 0.0011             | 10000      | 10000     |
| CLP             | 2             | 1               | 1              | 20  | 18                 | 0.0524           | 0.0584          | 0.006              | 9996       | 9996      |
| CLP             | 3             | 1               | 1              | 20  | 17.3333            | 0.0483           | 0.0588          | 0.0105             | 9987       | 9984      |
| CLP             | 4             | 1               | 1              | 20  | 16.6667            | 0.0444           | 0.0491          | 0.0048             | 9979       | 9975      |
| CLP             | 5             | 1               | 1              | 20  | 16                 | 0.0407           | 0.0561          | 0.0155             | 9968       | 9921      |
| CLP             | 1             | 1               | 1.5            | 20  | 20                 | 0.2015           | 0.1978          | 0.0037             | 10000      | 10000     |
| CLP             | 2             | 1               | 1.5            | 20  | 18                 | 0.1512           | 0.1539          | 0.0027             | 9999       | 9999      |
| CLP             | 3             | 1               | 1.5            | 20  | 17.3333            | 0.1359           | 0.1361          | 2e-04              | 9988       | 9987      |
| CLP             | 4             | 1               | 1.5            | 20  | 16.6667            | 0.1215           | 0.1311          | 0.0096             | 9973       | 9963      |
| CLP             | 5             | 1               | 1.5            | 20  | 16                 | 0.1078           | 0.1176          | 0.0098             | 9964       | 9931      |
| CLP             | 1             | 1               | 2              | 20  | 20                 | 0.4506           | 0.444           | 0.0066             | 10000      | 10000     |
| CLP             | 2             | 1               | 2              | 20  | 18                 | 0.3448           | 0.3311          | 0.0137             | 9999       | 9999      |
| CLP             | 3             | 1               | 2              | 20  | 17.3333            | 0.3103           | 0.2844          | 0.0258             | 9988       | 9988      |
| CLP             | 4             | 1               | 2              | 20  | 16.6667            | 0.2766           | 0.2721          | 0.0044             | 9975       | 9969      |
| CLP             | 5             | 1               | 2              | 20  | 16                 | 0.244            | 0.2359          | 0.0082             | 9972       | 9916      |
| CLP             | 1             | 2               | 0              | 20  | 20                 | 0.01             | 0.0078          | 0.0022             | 10000      | 10000     |
| CLP             | 2             | 2               | 0              | 20  | 18                 | 0.01             | 0.0129          | 0.0029             | 10000      | 10000     |
| CLP             | 3             | 2               | 0              | 20  | 17.3333            | 0.01             | 0.0133          | 0.0033             | 9984       | 9984      |
| CLP             | 4             | 2               | 0              | 20  | 16.6667            | 0.01             | 0.0179          | 0.0079             | 9982       | 9973      |
| CLP             | 5             | 2               | 0              | 20  | 16                 | 0.01             | 0.0194          | 0.0094             | 9962       | 9919      |
| CLP             | 1             | 2               | 0.5            | 20  | 20                 | 0.0142           | 0.0156          | 0.0014             | 10000      | 10000     |
| CLP             | 2             | 2               | 0.5            | 20  | 18                 | 0.0135           | 0.0161          | 0.0026             | 9999       | 9999      |
| CLP             | 3             | 2               | 0.5            | 20  | 17.3333            | 0.0132           | 0.0184          | 0.0052             | 9992       | 9991      |
| CLP             | 4             | 2               | 0.5            | 20  | 16.6667            | 0.0129           | 0.0202          | 0.0072             | 9965       | 9952      |
| CLP             | 5             | 2               | 0.5            | 20  | 16                 | 0.0127           | 0.026           | 0.0133             | 9962       | 9925      |
| CLP             | 1             | 2               | 1              | 20  | 20                 | 0.0316           | 0.0319          | 3e-04              | 10000      | 10000     |
| CLP             | 2             | 2               | 1              | 20  | 18                 | 0.0269           | 0.0303          | 0.0034             | 10000      | 10000     |

|     |   |   |     |    |         |        |        |        |       |       |
|-----|---|---|-----|----|---------|--------|--------|--------|-------|-------|
| CLP | 3 | 2 | 1   | 20 | 17.3333 | 0.0255 | 0.0321 | 0.0066 | 9981  | 9981  |
| CLP | 4 | 2 | 1   | 20 | 16.6667 | 0.0241 | 0.0317 | 0.0076 | 9978  | 9973  |
| CLP | 5 | 2 | 1   | 20 | 16      | 0.0227 | 0.0336 | 0.0108 | 9962  | 9924  |
| CLP | 1 | 2 | 1.5 | 20 | 20      | 0.0765 | 0.0789 | 0.0024 | 10000 | 10000 |
| CLP | 2 | 2 | 1.5 | 20 | 18      | 0.0601 | 0.0644 | 0.0043 | 10000 | 10000 |
| CLP | 3 | 2 | 1.5 | 20 | 17.3333 | 0.0551 | 0.06   | 0.0049 | 9985  | 9982  |
| CLP | 4 | 2 | 1.5 | 20 | 16.6667 | 0.0504 | 0.0565 | 0.0061 | 9970  | 9964  |
| CLP | 5 | 2 | 1.5 | 20 | 16      | 0.046  | 0.0595 | 0.0135 | 9963  | 9919  |
| CLP | 1 | 2 | 2   | 20 | 20      | 0.1697 | 0.1669 | 0.0028 | 10000 | 10000 |
| CLP | 2 | 2 | 2   | 20 | 18      | 0.1279 | 0.1264 | 0.0014 | 9998  | 9998  |
| CLP | 3 | 2 | 2   | 20 | 17.3333 | 0.1152 | 0.1164 | 0.0012 | 9986  | 9982  |
| CLP | 4 | 2 | 2   | 20 | 16.6667 | 0.1032 | 0.1136 | 0.0103 | 9976  | 9969  |
| CLP | 5 | 2 | 2   | 20 | 16      | 0.092  | 0.1049 | 0.0129 | 9959  | 9916  |
| CLP | 1 | 1 | 0   | 40 | 40      | 0.01   | 0.0118 | 0.0018 | 10000 | 10000 |
| CLP | 2 | 1 | 0   | 40 | 36      | 0.01   | 0.0107 | 7e-04  | 10000 | 10000 |
| CLP | 3 | 1 | 0   | 40 | 34.6667 | 0.01   | 0.011  | 0.001  | 10000 | 10000 |
| CLP | 4 | 1 | 0   | 40 | 33.3333 | 0.01   | 0.0115 | 0.0015 | 10000 | 10000 |
| CLP | 5 | 1 | 0   | 40 | 32      | 0.01   | 0.0111 | 0.0011 | 10000 | 10000 |
| CLP | 1 | 1 | 0.5 | 40 | 40      | 0.0392 | 0.0395 | 3e-04  | 10000 | 10000 |
| CLP | 2 | 1 | 0.5 | 40 | 36      | 0.0342 | 0.0345 | 3e-04  | 10000 | 10000 |
| CLP | 3 | 1 | 0.5 | 40 | 34.6667 | 0.0326 | 0.0314 | 0.0012 | 10000 | 10000 |
| CLP | 4 | 1 | 0.5 | 40 | 33.3333 | 0.0311 | 0.0318 | 7e-04  | 10000 | 10000 |
| CLP | 5 | 1 | 0.5 | 40 | 32      | 0.0296 | 0.0318 | 0.0022 | 10000 | 10000 |
| CLP | 1 | 1 | 1   | 40 | 40      | 0.2415 | 0.2395 | 0.002  | 10000 | 10000 |
| CLP | 2 | 1 | 1   | 40 | 36      | 0.1961 | 0.1877 | 0.0084 | 10000 | 10000 |
| CLP | 3 | 1 | 1   | 40 | 34.6667 | 0.1817 | 0.153  | 0.0287 | 10000 | 10000 |
| CLP | 4 | 1 | 1   | 40 | 33.3333 | 0.1677 | 0.173  | 0.0053 | 10000 | 10000 |
| CLP | 5 | 1 | 1   | 40 | 32      | 0.1542 | 0.1423 | 0.0119 | 10000 | 10000 |
| CLP | 1 | 1 | 1.5 | 40 | 40      | 0.6833 | 0.6755 | 0.0078 | 10000 | 10000 |
| CLP | 2 | 1 | 1.5 | 40 | 36      | 0.591  | 0.5674 | 0.0236 | 10000 | 10000 |
| CLP | 3 | 1 | 1.5 | 40 | 34.6667 | 0.5574 | 0.5049 | 0.0525 | 10000 | 10000 |
| CLP | 4 | 1 | 1.5 | 40 | 33.3333 | 0.5227 | 0.5158 | 0.0069 | 10000 | 10000 |
| CLP | 5 | 1 | 1.5 | 40 | 32      | 0.487  | 0.4502 | 0.0368 | 10000 | 10000 |
| CLP | 1 | 1 | 2   | 40 | 40      | 0.9554 | 0.9525 | 0.0029 | 10000 | 10000 |
| CLP | 2 | 1 | 2   | 40 | 36      | 0.9131 | 0.8913 | 0.0218 | 10000 | 10000 |
| CLP | 3 | 1 | 2   | 40 | 34.6667 | 0.8929 | 0.8406 | 0.0523 | 10000 | 10000 |
| CLP | 4 | 1 | 2   | 40 | 33.3333 | 0.8689 | 0.8511 | 0.0178 | 10000 | 10000 |
| CLP | 5 | 1 | 2   | 40 | 32      | 0.8408 | 0.7852 | 0.0556 | 10000 | 10000 |
| CLP | 1 | 2 | 0   | 40 | 40      | 0.01   | 0.0108 | 8e-04  | 10000 | 10000 |
| CLP | 2 | 2 | 0   | 40 | 36      | 0.01   | 0.0111 | 0.0011 | 10000 | 10000 |
| CLP | 3 | 2 | 0   | 40 | 34.6667 | 0.01   | 0.0122 | 0.0022 | 10000 | 10000 |
| CLP | 4 | 2 | 0   | 40 | 33.3333 | 0.01   | 0.0108 | 8e-04  | 10000 | 10000 |
| CLP | 5 | 2 | 0   | 40 | 32      | 0.01   | 0.0093 | 7e-04  | 10000 | 10000 |
| CLP | 1 | 2 | 0.5 | 40 | 40      | 0.0221 | 0.0242 | 0.0021 | 10000 | 10000 |
| CLP | 2 | 2 | 0.5 | 40 | 36      | 0.0202 | 0.0192 | 0.001  | 10000 | 10000 |

|     |   |   |     |    |         |        |        |        |       |       |
|-----|---|---|-----|----|---------|--------|--------|--------|-------|-------|
| CLP | 3 | 2 | 0.5 | 40 | 34.6667 | 0.0196 | 0.0192 | 4e-04  | 10000 | 10000 |
| CLP | 4 | 2 | 0.5 | 40 | 33.3333 | 0.019  | 0.0205 | 0.0015 | 10000 | 10000 |
| CLP | 5 | 2 | 0.5 | 40 | 32      | 0.0185 | 0.0201 | 0.0016 | 10000 | 10000 |
| CLP | 1 | 2 | 1   | 40 | 40      | 0.0891 | 0.0869 | 0.0022 | 10000 | 10000 |
| CLP | 2 | 2 | 1   | 40 | 36      | 0.074  | 0.074  | 0      | 10000 | 10000 |
| CLP | 3 | 2 | 1   | 40 | 34.6667 | 0.0693 | 0.069  | 3e-04  | 10000 | 10000 |
| CLP | 4 | 2 | 1   | 40 | 33.3333 | 0.0648 | 0.062  | 0.0028 | 10000 | 10000 |
| CLP | 5 | 2 | 1   | 40 | 32      | 0.0604 | 0.0615 | 0.0011 | 10000 | 10000 |
| CLP | 1 | 2 | 1.5 | 40 | 40      | 0.2869 | 0.2912 | 0.0043 | 10000 | 10000 |
| CLP | 2 | 2 | 1.5 | 40 | 36      | 0.2334 | 0.2285 | 0.0049 | 10000 | 10000 |
| CLP | 3 | 2 | 1.5 | 40 | 34.6667 | 0.2162 | 0.1926 | 0.0236 | 10000 | 10000 |
| CLP | 4 | 2 | 1.5 | 40 | 33.3333 | 0.1995 | 0.2033 | 0.0038 | 10000 | 10000 |
| CLP | 5 | 2 | 1.5 | 40 | 32      | 0.1833 | 0.1754 | 0.0079 | 10000 | 10000 |
| CLP | 1 | 2 | 2   | 40 | 40      | 0.6066 | 0.6122 | 0.0056 | 10000 | 10000 |
| CLP | 2 | 2 | 2   | 40 | 36      | 0.5158 | 0.4941 | 0.0217 | 10000 | 10000 |
| CLP | 3 | 2 | 2   | 40 | 34.6667 | 0.4839 | 0.4339 | 0.05   | 10000 | 10000 |
| CLP | 4 | 2 | 2   | 40 | 33.3333 | 0.4513 | 0.4536 | 0.0023 | 10000 | 10000 |
| CLP | 5 | 2 | 2   | 40 | 32      | 0.4184 | 0.3946 | 0.0238 | 10000 | 10000 |
