# Supplementary material
Source: publisher figshare collection journal article supplement (https://tandf.figshare.com/articles/dataset/_/14374261)
Supplement: Supplementary file 4 [file 1]

# Scenario 3 Validation Results: Two-Sample t-Test for Various Sample Sizes

*Kevin P. Josey*

*December 20, 2017*

## 1 Study Design

Scenario 3 emulates a balanced, two-sample study design. We devise a two-sample t-test comparing the difference in mean responses between the two samples. Since this example considers only a single repeated measurement, only conditional linear missing data processes are considered.

### 1.1 Linear Mixed Model Inputs

#### 1.1.1 Type I Error Rates ( $\alpha$ )

0.0100

#### 1.1.2 Beta Scale Values ( $\delta_\beta$ )

0.0000, 0.0500, 0.1000, 0.1500, 0.2000, 0.2500, 0.3000, 0.3500, 0.4000, 0.4500, 0.5000,  
0.5500, 0.6000, 0.6500, 0.7000

#### 1.1.3 Sigma Scale Values ( $\delta_\sigma$ )

1.0000

#### 1.1.4 Planned Sample Sizes ( $N$ )

6, 12, 18, 24, 30, 36

#### 1.1.5 Matrix Inputs

$$Es(\mathbf{X}_M) = \begin{bmatrix} 1.0000 & 0.0000 \\ 0.0000 & 1.0000 \end{bmatrix}$$

$$\boldsymbol{\beta} = \begin{bmatrix} 0.0000 \\ 1.0000 \end{bmatrix}$$

$$\mathbf{L} = \begin{bmatrix} 1.0000 & -1.0000 \end{bmatrix}$$

$$\boldsymbol{\theta}_0 = \begin{bmatrix} 0.0000 \end{bmatrix}$$

$$\boldsymbol{\Sigma}_M = \begin{bmatrix} 1.0000 \end{bmatrix}$$

## 2 Conditional Linear Missing Data Models

| Pattern<br>Index | $\pi$  |
|------------------|--------|
| 1                | 0.0000 |
| 2                | 0.1000 |
| 3                | 0.2000 |

### 3 Validation Results

#### 3.1 Summary Statistics

|                                                    |        |
|----------------------------------------------------|--------|
| Maximum Deviation from the Complete Case Scenarios | 0.0394 |
| Maximum Deviation from the Observed Case Scenarios | NA     |

#### 3.2 Full Validation Results

##### 3.2.1 Complete Case Analysis

| Missing Process | Pattern Index | $\delta_\sigma$ | $\delta_\beta$ | $N$ | $\mathcal{E}(N_c)$ | Analytical Power | Empirical Power | Absolute Deviation | Iterations | Converged |
|-----------------|---------------|-----------------|----------------|-----|--------------------|------------------|-----------------|--------------------|------------|-----------|
| CLP             | 1             | 1               | 0              | 6   | 6                  | 0.01             | 0.009           | 0.001              | 10000      | 10000     |
| CLP             | 2             | 1               | 0              | 6   | 5.4                | 0.01             | 0.009           | 0.001              | 9979       | 9974      |
| CLP             | 3             | 1               | 0              | 6   | 4.8                | 0.01             | 0.0086          | 0.0014             | 9825       | 9739      |
| CLP             | 1             | 1               | 0.05           | 6   | 6                  | 0.011            | 0.0115          | 5e-04              | 10000      | 10000     |
| CLP             | 2             | 1               | 0.05           | 6   | 5.4                | 0.0107           | 0.0108          | 1e-04              | 9986       | 9979      |
| CLP             | 3             | 1               | 0.05           | 6   | 4.8                | 0.0105           | 0.0114          | 9e-04              | 9841       | 9756      |
| CLP             | 1             | 1               | 0.1            | 6   | 6                  | 0.0139           | 0.0149          | 0.001              | 10000      | 10000     |
| CLP             | 2             | 1               | 0.1            | 6   | 5.4                | 0.0129           | 0.0129          | 0                  | 9980       | 9971      |
| CLP             | 3             | 1               | 0.1            | 6   | 4.8                | 0.0121           | 0.0116          | 5e-04              | 9840       | 9756      |
| CLP             | 1             | 1               | 0.15           | 6   | 6                  | 0.019            | 0.0183          | 7e-04              | 10000      | 10000     |
| CLP             | 2             | 1               | 0.15           | 6   | 5.4                | 0.0167           | 0.0172          | 4e-04              | 9976       | 9969      |
| CLP             | 3             | 1               | 0.15           | 6   | 4.8                | 0.0147           | 0.0186          | 0.0039             | 9853       | 9775      |
| CLP             | 1             | 1               | 0.2            | 6   | 6                  | 0.0266           | 0.0272          | 6e-04              | 10000      | 10000     |
| CLP             | 2             | 1               | 0.2            | 6   | 5.4                | 0.0222           | 0.0239          | 0.0017             | 9981       | 9968      |
| CLP             | 3             | 1               | 0.2            | 6   | 4.8                | 0.0184           | 0.0218          | 0.0034             | 9827       | 9739      |
| CLP             | 1             | 1               | 0.25           | 6   | 6                  | 0.0369           | 0.0356          | 0.0013             | 10000      | 10000     |
| CLP             | 2             | 1               | 0.25           | 6   | 5.4                | 0.0296           | 0.0302          | 6e-04              | 9975       | 9968      |
| CLP             | 3             | 1               | 0.25           | 6   | 4.8                | 0.0233           | 0.0284          | 0.0051             | 9870       | 9789      |
| CLP             | 1             | 1               | 0.3            | 6   | 6                  | 0.0505           | 0.0496          | 9e-04              | 10000      | 10000     |
| CLP             | 2             | 1               | 0.3            | 6   | 5.4                | 0.039            | 0.0391          | 1e-04              | 9985       | 9971      |
| CLP             | 3             | 1               | 0.3            | 6   | 4.8                | 0.0295           | 0.0345          | 0.005              | 9830       | 9733      |
| CLP             | 1             | 1               | 0.35           | 6   | 6                  | 0.0676           | 0.0676          | 0                  | 10000      | 10000     |
| CLP             | 2             | 1               | 0.35           | 6   | 5.4                | 0.0508           | 0.0574          | 0.0066             | 9975       | 9963      |
| CLP             | 3             | 1               | 0.35           | 6   | 4.8                | 0.037            | 0.0424          | 0.0054             | 9857       | 9769      |
| CLP             | 1             | 1               | 0.4            | 6   | 6                  | 0.0885           | 0.0865          | 0.002              | 10000      | 10000     |
| CLP             | 2             | 1               | 0.4            | 6   | 5.4                | 0.065            | 0.0667          | 0.0017             | 9983       | 9976      |
| CLP             | 3             | 1               | 0.4            | 6   | 4.8                | 0.0458           | 0.0578          | 0.0119             | 9857       | 9766      |
| CLP             | 1             | 1               | 0.45           | 6   | 6                  | 0.1136           | 0.1189          | 0.0053             | 10000      | 10000     |
| CLP             | 2             | 1               | 0.45           | 6   | 5.4                | 0.0818           | 0.0861          | 0.0043             | 9984       | 9979      |
| CLP             | 3             | 1               | 0.45           | 6   | 4.8                | 0.0562           | 0.0681          | 0.0119             | 9851       | 9754      |
| CLP             | 1             | 1               | 0.5            | 6   | 6                  | 0.1429           | 0.1421          | 8e-04              | 10000      | 10000     |
| CLP             | 2             | 1               | 0.5            | 6   | 5.4                | 0.1013           | 0.1105          | 0.0091             | 9975       | 9968      |
| CLP             | 3             | 1               | 0.5            | 6   | 4.8                | 0.068            | 0.0896          | 0.0216             | 9845       | 9743      |
| CLP             | 1             | 1               | 0.55           | 6   | 6                  | 0.1764           | 0.1761          | 3e-04              | 10000      | 10000     |
| CLP             | 2             | 1               | 0.55           | 6   | 5.4                | 0.1236           | 0.1333          | 0.0096             | 9977       | 9972      |

|     |   |   |      |    |      |        |        |        |       |       |
|-----|---|---|------|----|------|--------|--------|--------|-------|-------|
| CLP | 3 | 1 | 0.55 | 6  | 4.8  | 0.0814 | 0.1038 | 0.0224 | 9819  | 9731  |
| CLP | 1 | 1 | 0.6  | 6  | 6    | 0.214  | 0.2133 | 7e-04  | 10000 | 10000 |
| CLP | 2 | 1 | 0.6  | 6  | 5.4  | 0.1487 | 0.1656 | 0.0169 | 9970  | 9968  |
| CLP | 3 | 1 | 0.6  | 6  | 4.8  | 0.0963 | 0.1209 | 0.0246 | 9837  | 9760  |
| CLP | 1 | 1 | 0.65 | 6  | 6    | 0.2551 | 0.2527 | 0.0024 | 10000 | 10000 |
| CLP | 2 | 1 | 0.65 | 6  | 5.4  | 0.1765 | 0.1916 | 0.0151 | 9980  | 9975  |
| CLP | 3 | 1 | 0.65 | 6  | 4.8  | 0.1128 | 0.1391 | 0.0263 | 9825  | 9741  |
| CLP | 1 | 1 | 0.7  | 6  | 6    | 0.2995 | 0.3058 | 0.0063 | 10000 | 10000 |
| CLP | 2 | 1 | 0.7  | 6  | 5.4  | 0.2068 | 0.2357 | 0.0289 | 9974  | 9968  |
| CLP | 3 | 1 | 0.7  | 6  | 4.8  | 0.1308 | 0.1702 | 0.0394 | 9866  | 9776  |
| CLP | 1 | 1 | 0    | 12 | 12   | 0.01   | 0.0088 | 0.0012 | 10000 | 10000 |
| CLP | 2 | 1 | 0    | 12 | 10.8 | 0.01   | 0.0083 | 0.0017 | 10000 | 10000 |
| CLP | 3 | 1 | 0    | 12 | 9.6  | 0.01   | 0.01   | 0      | 10000 | 10000 |
| CLP | 1 | 1 | 0.05 | 12 | 12   | 0.013  | 0.0134 | 4e-04  | 10000 | 10000 |
| CLP | 2 | 1 | 0.05 | 12 | 10.8 | 0.0126 | 0.0138 | 0.0012 | 10000 | 10000 |
| CLP | 3 | 1 | 0.05 | 12 | 9.6  | 0.0121 | 0.0134 | 0.0013 | 9998  | 9998  |
| CLP | 1 | 1 | 0.1  | 12 | 12   | 0.0229 | 0.023  | 1e-04  | 10000 | 10000 |
| CLP | 2 | 1 | 0.1  | 12 | 10.8 | 0.0208 | 0.0231 | 0.0023 | 10000 | 10000 |
| CLP | 3 | 1 | 0.1  | 12 | 9.6  | 0.0187 | 0.0187 | 0      | 10000 | 10000 |
| CLP | 1 | 1 | 0.15 | 12 | 12   | 0.042  | 0.0415 | 5e-04  | 10000 | 10000 |
| CLP | 2 | 1 | 0.15 | 12 | 10.8 | 0.0362 | 0.0379 | 0.0017 | 10000 | 10000 |
| CLP | 3 | 1 | 0.15 | 12 | 9.6  | 0.0308 | 0.0309 | 1e-04  | 10000 | 10000 |
| CLP | 1 | 1 | 0.2  | 12 | 12   | 0.0732 | 0.0778 | 0.0046 | 10000 | 10000 |
| CLP | 2 | 1 | 0.2  | 12 | 10.8 | 0.0613 | 0.0655 | 0.0042 | 10000 | 10000 |
| CLP | 3 | 1 | 0.2  | 12 | 9.6  | 0.0501 | 0.0515 | 0.0014 | 10000 | 10000 |
| CLP | 1 | 1 | 0.25 | 12 | 12   | 0.12   | 0.1226 | 0.0026 | 10000 | 10000 |
| CLP | 2 | 1 | 0.25 | 12 | 10.8 | 0.0984 | 0.0963 | 0.0021 | 10000 | 10000 |
| CLP | 3 | 1 | 0.25 | 12 | 9.6  | 0.0784 | 0.0832 | 0.0048 | 9998  | 9998  |
| CLP | 1 | 1 | 0.3  | 12 | 12   | 0.1844 | 0.1798 | 0.0046 | 10000 | 10000 |
| CLP | 2 | 1 | 0.3  | 12 | 10.8 | 0.1496 | 0.1494 | 2e-04  | 10000 | 10000 |
| CLP | 3 | 1 | 0.3  | 12 | 9.6  | 0.1172 | 0.1135 | 0.0037 | 10000 | 10000 |
| CLP | 1 | 1 | 0.35 | 12 | 12   | 0.2665 | 0.2579 | 0.0086 | 10000 | 10000 |
| CLP | 2 | 1 | 0.35 | 12 | 10.8 | 0.2157 | 0.2196 | 0.0039 | 10000 | 10000 |
| CLP | 3 | 1 | 0.35 | 12 | 9.6  | 0.1678 | 0.1758 | 0.008  | 10000 | 10000 |
| CLP | 1 | 1 | 0.4  | 12 | 12   | 0.3634 | 0.3602 | 0.0032 | 10000 | 10000 |
| CLP | 2 | 1 | 0.4  | 12 | 10.8 | 0.2959 | 0.2998 | 0.0039 | 10000 | 10000 |
| CLP | 3 | 1 | 0.4  | 12 | 9.6  | 0.2302 | 0.2345 | 0.0044 | 9998  | 9998  |
| CLP | 1 | 1 | 0.45 | 12 | 12   | 0.4696 | 0.4714 | 0.0018 | 10000 | 10000 |
| CLP | 2 | 1 | 0.45 | 12 | 10.8 | 0.387  | 0.3938 | 0.0068 | 10000 | 10000 |
| CLP | 3 | 1 | 0.45 | 12 | 9.6  | 0.3032 | 0.318  | 0.0148 | 10000 | 10000 |
| CLP | 1 | 1 | 0.5  | 12 | 12   | 0.5775 | 0.5699 | 0.0076 | 10000 | 10000 |
| CLP | 2 | 1 | 0.5  | 12 | 10.8 | 0.4843 | 0.495  | 0.0107 | 10000 | 10000 |
| CLP | 3 | 1 | 0.5  | 12 | 9.6  | 0.3847 | 0.3902 | 0.0055 | 9999  | 9999  |
| CLP | 1 | 1 | 0.55 | 12 | 12   | 0.6795 | 0.6797 | 2e-04  | 10000 | 10000 |
| CLP | 2 | 1 | 0.55 | 12 | 10.8 | 0.5821 | 0.584  | 0.0019 | 10000 | 10000 |

|     |   |   |      |    |      |        |        |        |       |       |
|-----|---|---|------|----|------|--------|--------|--------|-------|-------|
| CLP | 3 | 1 | 0.55 | 12 | 9.6  | 0.4711 | 0.4859 | 0.0149 | 9999  | 9999  |
| CLP | 1 | 1 | 0.6  | 12 | 12   | 0.7691 | 0.7689 | 2e-04  | 10000 | 10000 |
| CLP | 2 | 1 | 0.6  | 12 | 10.8 | 0.6747 | 0.6725 | 0.0022 | 10000 | 10000 |
| CLP | 3 | 1 | 0.6  | 12 | 9.6  | 0.5583 | 0.5661 | 0.0078 | 10000 | 10000 |
| CLP | 1 | 1 | 0.65 | 12 | 12   | 0.8425 | 0.8463 | 0.0038 | 10000 | 10000 |
| CLP | 2 | 1 | 0.65 | 12 | 10.8 | 0.7572 | 0.7532 | 0.004  | 10000 | 10000 |
| CLP | 3 | 1 | 0.65 | 12 | 9.6  | 0.6424 | 0.6478 | 0.0054 | 9999  | 9999  |
| CLP | 1 | 1 | 0.7  | 12 | 12   | 0.8984 | 0.894  | 0.0044 | 10000 | 10000 |
| CLP | 2 | 1 | 0.7  | 12 | 10.8 | 0.8265 | 0.8219 | 0.0046 | 10000 | 10000 |
| CLP | 3 | 1 | 0.7  | 12 | 9.6  | 0.7196 | 0.7224 | 0.0028 | 9998  | 9998  |
| CLP | 1 | 1 | 0    | 18 | 18   | 0.01   | 0.0111 | 0.0011 | 10000 | 10000 |
| CLP | 2 | 1 | 0    | 18 | 16.2 | 0.01   | 0.0109 | 9e-04  | 10000 | 10000 |
| CLP | 3 | 1 | 0    | 18 | 14.4 | 0.01   | 0.0119 | 0.0019 | 10000 | 10000 |
| CLP | 1 | 1 | 0.05 | 18 | 18   | 0.0152 | 0.0149 | 3e-04  | 10000 | 10000 |
| CLP | 2 | 1 | 0.05 | 18 | 16.2 | 0.0145 | 0.0147 | 2e-04  | 10000 | 10000 |
| CLP | 3 | 1 | 0.05 | 18 | 14.4 | 0.0138 | 0.0142 | 4e-04  | 10000 | 10000 |
| CLP | 1 | 1 | 0.1  | 18 | 18   | 0.0332 | 0.0317 | 0.0015 | 10000 | 10000 |
| CLP | 2 | 1 | 0.1  | 18 | 16.2 | 0.0297 | 0.0305 | 8e-04  | 10000 | 10000 |
| CLP | 3 | 1 | 0.1  | 18 | 14.4 | 0.0263 | 0.0257 | 6e-04  | 10000 | 10000 |
| CLP | 1 | 1 | 0.15 | 18 | 18   | 0.07   | 0.0646 | 0.0054 | 10000 | 10000 |
| CLP | 2 | 1 | 0.15 | 18 | 16.2 | 0.0603 | 0.0594 | 9e-04  | 10000 | 10000 |
| CLP | 3 | 1 | 0.15 | 18 | 14.4 | 0.0511 | 0.052  | 9e-04  | 10000 | 10000 |
| CLP | 1 | 1 | 0.2  | 18 | 18   | 0.1331 | 0.1354 | 0.0023 | 10000 | 10000 |
| CLP | 2 | 1 | 0.2  | 18 | 16.2 | 0.1122 | 0.1067 | 0.0055 | 10000 | 10000 |
| CLP | 3 | 1 | 0.2  | 18 | 14.4 | 0.0926 | 0.0966 | 0.004  | 10000 | 10000 |
| CLP | 1 | 1 | 0.25 | 18 | 18   | 0.2272 | 0.2232 | 0.004  | 10000 | 10000 |
| CLP | 2 | 1 | 0.25 | 18 | 16.2 | 0.1903 | 0.1954 | 0.0051 | 10000 | 10000 |
| CLP | 3 | 1 | 0.25 | 18 | 14.4 | 0.155  | 0.1602 | 0.0052 | 10000 | 10000 |
| CLP | 1 | 1 | 0.3  | 18 | 18   | 0.3502 | 0.3531 | 0.0029 | 10000 | 10000 |
| CLP | 2 | 1 | 0.3  | 18 | 16.2 | 0.2947 | 0.3018 | 0.0071 | 10000 | 10000 |
| CLP | 3 | 1 | 0.3  | 18 | 14.4 | 0.24   | 0.2462 | 0.0062 | 10000 | 10000 |
| CLP | 1 | 1 | 0.35 | 18 | 18   | 0.4911 | 0.4958 | 0.0047 | 10000 | 10000 |
| CLP | 2 | 1 | 0.35 | 18 | 16.2 | 0.4194 | 0.4284 | 0.009  | 10000 | 10000 |
| CLP | 3 | 1 | 0.35 | 18 | 14.4 | 0.3453 | 0.3571 | 0.0118 | 10000 | 10000 |
| CLP | 1 | 1 | 0.4  | 18 | 18   | 0.6328 | 0.6408 | 0.008  | 10000 | 10000 |
| CLP | 2 | 1 | 0.4  | 18 | 16.2 | 0.5526 | 0.5574 | 0.0048 | 10000 | 10000 |
| CLP | 3 | 1 | 0.4  | 18 | 14.4 | 0.4639 | 0.4685 | 0.0046 | 10000 | 10000 |
| CLP | 1 | 1 | 0.45 | 18 | 18   | 0.7581 | 0.7575 | 6e-04  | 10000 | 10000 |
| CLP | 2 | 1 | 0.45 | 18 | 16.2 | 0.6797 | 0.6772 | 0.0025 | 10000 | 10000 |
| CLP | 3 | 1 | 0.45 | 18 | 14.4 | 0.5854 | 0.5909 | 0.0055 | 10000 | 10000 |
| CLP | 1 | 1 | 0.5  | 18 | 18   | 0.8555 | 0.8551 | 4e-04  | 10000 | 10000 |
| CLP | 2 | 1 | 0.5  | 18 | 16.2 | 0.7883 | 0.7856 | 0.0027 | 10000 | 10000 |
| CLP | 3 | 1 | 0.5  | 18 | 14.4 | 0.6989 | 0.6951 | 0.0038 | 10000 | 10000 |
| CLP | 1 | 1 | 0.55 | 18 | 18   | 0.9222 | 0.9168 | 0.0054 | 10000 | 10000 |
| CLP | 2 | 1 | 0.55 | 18 | 16.2 | 0.8715 | 0.867  | 0.0045 | 10000 | 10000 |

|     |   |   |      |    |      |        |        |        |       |       |
|-----|---|---|------|----|------|--------|--------|--------|-------|-------|
| CLP | 3 | 1 | 0.55 | 18 | 14.4 | 0.7955 | 0.7977 | 0.0022 | 10000 | 10000 |
| CLP | 1 | 1 | 0.6  | 18 | 18   | 0.9624 | 0.9654 | 0.003  | 10000 | 10000 |
| CLP | 2 | 1 | 0.6  | 18 | 16.2 | 0.9287 | 0.9291 | 4e-04  | 10000 | 10000 |
| CLP | 3 | 1 | 0.6  | 18 | 14.4 | 0.8706 | 0.8667 | 0.0039 | 10000 | 10000 |
| CLP | 1 | 1 | 0.65 | 18 | 18   | 0.9837 | 0.9841 | 4e-04  | 10000 | 10000 |
| CLP | 2 | 1 | 0.65 | 18 | 16.2 | 0.9639 | 0.9604 | 0.0035 | 10000 | 10000 |
| CLP | 3 | 1 | 0.65 | 18 | 14.4 | 0.924  | 0.912  | 0.012  | 10000 | 10000 |
| CLP | 1 | 1 | 0.7  | 18 | 18   | 0.9937 | 0.9931 | 6e-04  | 10000 | 10000 |
| CLP | 2 | 1 | 0.7  | 18 | 16.2 | 0.9833 | 0.9812 | 0.0021 | 10000 | 10000 |
| CLP | 3 | 1 | 0.7  | 18 | 14.4 | 0.9586 | 0.9493 | 0.0093 | 10000 | 10000 |
| CLP | 1 | 1 | 0    | 24 | 24   | 0.01   | 0.0093 | 7e-04  | 10000 | 10000 |
| CLP | 2 | 1 | 0    | 24 | 21.6 | 0.01   | 0.0107 | 7e-04  | 10000 | 10000 |
| CLP | 3 | 1 | 0    | 24 | 19.2 | 0.01   | 0.0113 | 0.0013 | 10000 | 10000 |
| CLP | 1 | 1 | 0.05 | 24 | 24   | 0.0175 | 0.015  | 0.0025 | 10000 | 10000 |
| CLP | 2 | 1 | 0.05 | 24 | 21.6 | 0.0165 | 0.0178 | 0.0013 | 10000 | 10000 |
| CLP | 3 | 1 | 0.05 | 24 | 19.2 | 0.0155 | 0.0153 | 2e-04  | 10000 | 10000 |
| CLP | 1 | 1 | 0.1  | 24 | 24   | 0.0444 | 0.0444 | 0      | 10000 | 10000 |
| CLP | 2 | 1 | 0.1  | 24 | 21.6 | 0.0394 | 0.0381 | 0.0013 | 10000 | 10000 |
| CLP | 3 | 1 | 0.1  | 24 | 19.2 | 0.0347 | 0.0346 | 1e-04  | 10000 | 10000 |
| CLP | 1 | 1 | 0.15 | 24 | 24   | 0.1021 | 0.1044 | 0.0023 | 10000 | 10000 |
| CLP | 2 | 1 | 0.15 | 24 | 21.6 | 0.0878 | 0.0875 | 3e-04  | 10000 | 10000 |
| CLP | 3 | 1 | 0.15 | 24 | 19.2 | 0.0743 | 0.0781 | 0.0038 | 10000 | 10000 |
| CLP | 1 | 1 | 0.2  | 24 | 24   | 0.2015 | 0.1947 | 0.0068 | 10000 | 10000 |
| CLP | 2 | 1 | 0.2  | 24 | 21.6 | 0.1713 | 0.1792 | 0.0079 | 10000 | 10000 |
| CLP | 3 | 1 | 0.2  | 24 | 19.2 | 0.1423 | 0.1497 | 0.0074 | 10000 | 10000 |
| CLP | 1 | 1 | 0.25 | 24 | 24   | 0.3436 | 0.3493 | 0.0057 | 10000 | 10000 |
| CLP | 2 | 1 | 0.25 | 24 | 21.6 | 0.2932 | 0.2956 | 0.0024 | 10000 | 10000 |
| CLP | 3 | 1 | 0.25 | 24 | 19.2 | 0.2434 | 0.2412 | 0.0022 | 10000 | 10000 |
| CLP | 1 | 1 | 0.3  | 24 | 24   | 0.512  | 0.5147 | 0.0027 | 10000 | 10000 |
| CLP | 2 | 1 | 0.3  | 24 | 21.6 | 0.4445 | 0.452  | 0.0075 | 10000 | 10000 |
| CLP | 3 | 1 | 0.3  | 24 | 19.2 | 0.3739 | 0.3858 | 0.0119 | 10000 | 10000 |
| CLP | 1 | 1 | 0.35 | 24 | 24   | 0.6781 | 0.67   | 0.0081 | 10000 | 10000 |
| CLP | 2 | 1 | 0.35 | 24 | 21.6 | 0.6042 | 0.6124 | 0.0082 | 10000 | 10000 |
| CLP | 3 | 1 | 0.35 | 24 | 19.2 | 0.5206 | 0.5272 | 0.0066 | 10000 | 10000 |
| CLP | 1 | 1 | 0.4  | 24 | 24   | 0.8144 | 0.823  | 0.0086 | 10000 | 10000 |
| CLP | 2 | 1 | 0.4  | 24 | 21.6 | 0.7477 | 0.747  | 7e-04  | 10000 | 10000 |
| CLP | 3 | 1 | 0.4  | 24 | 19.2 | 0.6643 | 0.6607 | 0.0036 | 10000 | 10000 |
| CLP | 1 | 1 | 0.45 | 24 | 24   | 0.9075 | 0.9141 | 0.0066 | 10000 | 10000 |
| CLP | 2 | 1 | 0.45 | 24 | 21.6 | 0.8577 | 0.861  | 0.0033 | 10000 | 10000 |
| CLP | 3 | 1 | 0.45 | 24 | 19.2 | 0.787  | 0.7855 | 0.0015 | 10000 | 10000 |
| CLP | 1 | 1 | 0.5  | 24 | 24   | 0.9605 | 0.9608 | 3e-04  | 10000 | 10000 |
| CLP | 2 | 1 | 0.5  | 24 | 21.6 | 0.9295 | 0.9279 | 0.0016 | 10000 | 10000 |
| CLP | 3 | 1 | 0.5  | 24 | 19.2 | 0.8784 | 0.8759 | 0.0025 | 10000 | 10000 |
| CLP | 1 | 1 | 0.55 | 24 | 24   | 0.9856 | 0.9869 | 0.0013 | 10000 | 10000 |
| CLP | 2 | 1 | 0.55 | 24 | 21.6 | 0.9695 | 0.9669 | 0.0026 | 10000 | 10000 |

|     |   |   |      |    |      |        |        |        |       |       |
|-----|---|---|------|----|------|--------|--------|--------|-------|-------|
| CLP | 3 | 1 | 0.55 | 24 | 19.2 | 0.9379 | 0.9311 | 0.0068 | 10000 | 10000 |
| CLP | 1 | 1 | 0.6  | 24 | 24   | 0.9955 | 0.9957 | 2e-04  | 10000 | 10000 |
| CLP | 2 | 1 | 0.6  | 24 | 21.6 | 0.9885 | 0.9875 | 0.001  | 10000 | 10000 |
| CLP | 3 | 1 | 0.6  | 24 | 19.2 | 0.9718 | 0.9671 | 0.0047 | 10000 | 10000 |
| CLP | 1 | 1 | 0.65 | 24 | 24   | 0.9988 | 0.9985 | 3e-04  | 10000 | 10000 |
| CLP | 2 | 1 | 0.65 | 24 | 21.6 | 0.9963 | 0.9942 | 0.0021 | 10000 | 10000 |
| CLP | 3 | 1 | 0.65 | 24 | 19.2 | 0.9886 | 0.9846 | 0.004  | 10000 | 10000 |
| CLP | 1 | 1 | 0.7  | 24 | 24   | 0.9997 | 0.9998 | 1e-04  | 10000 | 10000 |
| CLP | 2 | 1 | 0.7  | 24 | 21.6 | 0.9989 | 0.9983 | 6e-04  | 10000 | 10000 |
| CLP | 3 | 1 | 0.7  | 24 | 19.2 | 0.9959 | 0.9939 | 0.002  | 10000 | 10000 |
| CLP | 1 | 1 | 0    | 30 | 30   | 0.01   | 0.0094 | 6e-04  | 10000 | 10000 |
| CLP | 2 | 1 | 0    | 30 | 27   | 0.01   | 0.0106 | 6e-04  | 10000 | 10000 |
| CLP | 3 | 1 | 0    | 30 | 24   | 0.01   | 0.0108 | 8e-04  | 10000 | 10000 |
| CLP | 1 | 1 | 0.05 | 30 | 30   | 0.0198 | 0.0201 | 3e-04  | 10000 | 10000 |
| CLP | 2 | 1 | 0.05 | 30 | 27   | 0.0186 | 0.0184 | 2e-04  | 10000 | 10000 |
| CLP | 3 | 1 | 0.05 | 30 | 24   | 0.0173 | 0.0168 | 5e-04  | 10000 | 10000 |
| CLP | 1 | 1 | 0.1  | 30 | 30   | 0.0565 | 0.0543 | 0.0022 | 10000 | 10000 |
| CLP | 2 | 1 | 0.1  | 30 | 27   | 0.05   | 0.0493 | 7e-04  | 10000 | 10000 |
| CLP | 3 | 1 | 0.1  | 30 | 24   | 0.0437 | 0.0452 | 0.0015 | 10000 | 10000 |
| CLP | 1 | 1 | 0.15 | 30 | 30   | 0.1374 | 0.1358 | 0.0016 | 10000 | 10000 |
| CLP | 2 | 1 | 0.15 | 30 | 27   | 0.1183 | 0.1208 | 0.0025 | 10000 | 10000 |
| CLP | 3 | 1 | 0.15 | 30 | 24   | 0.1    | 0.1005 | 5e-04  | 10000 | 10000 |
| CLP | 1 | 1 | 0.2  | 30 | 30   | 0.2748 | 0.2714 | 0.0034 | 10000 | 10000 |
| CLP | 2 | 1 | 0.2  | 30 | 27   | 0.2355 | 0.2379 | 0.0024 | 10000 | 10000 |
| CLP | 3 | 1 | 0.2  | 30 | 24   | 0.1972 | 0.1955 | 0.0017 | 10000 | 10000 |
| CLP | 1 | 1 | 0.25 | 30 | 30   | 0.4581 | 0.4555 | 0.0026 | 10000 | 10000 |
| CLP | 2 | 1 | 0.25 | 30 | 27   | 0.398  | 0.3946 | 0.0034 | 10000 | 10000 |
| CLP | 3 | 1 | 0.25 | 30 | 24   | 0.3365 | 0.3348 | 0.0017 | 10000 | 10000 |
| CLP | 1 | 1 | 0.3  | 30 | 30   | 0.6508 | 0.6549 | 0.0041 | 10000 | 10000 |
| CLP | 2 | 1 | 0.3  | 30 | 27   | 0.5806 | 0.5816 | 0.001  | 10000 | 10000 |
| CLP | 3 | 1 | 0.3  | 30 | 24   | 0.5027 | 0.5024 | 3e-04  | 10000 | 10000 |
| CLP | 1 | 1 | 0.35 | 30 | 30   | 0.8105 | 0.814  | 0.0035 | 10000 | 10000 |
| CLP | 2 | 1 | 0.35 | 30 | 27   | 0.747  | 0.7448 | 0.0022 | 10000 | 10000 |
| CLP | 3 | 1 | 0.35 | 30 | 24   | 0.6683 | 0.6682 | 1e-04  | 10000 | 10000 |
| CLP | 1 | 1 | 0.4  | 30 | 30   | 0.9149 | 0.9089 | 0.006  | 10000 | 10000 |
| CLP | 2 | 1 | 0.4  | 30 | 27   | 0.8699 | 0.8728 | 0.0029 | 10000 | 10000 |
| CLP | 3 | 1 | 0.4  | 30 | 24   | 0.806  | 0.803  | 0.003  | 10000 | 10000 |
| CLP | 1 | 1 | 0.45 | 30 | 30   | 0.9688 | 0.9682 | 6e-04  | 10000 | 10000 |
| CLP | 2 | 1 | 0.45 | 30 | 27   | 0.9437 | 0.9401 | 0.0036 | 10000 | 10000 |
| CLP | 3 | 1 | 0.45 | 30 | 24   | 0.9016 | 0.8943 | 0.0073 | 10000 | 10000 |
| CLP | 1 | 1 | 0.5  | 30 | 30   | 0.9907 | 0.9905 | 2e-04  | 10000 | 10000 |
| CLP | 2 | 1 | 0.5  | 30 | 27   | 0.9796 | 0.9771 | 0.0025 | 10000 | 10000 |
| CLP | 3 | 1 | 0.5  | 30 | 24   | 0.9571 | 0.9515 | 0.0056 | 10000 | 10000 |
| CLP | 1 | 1 | 0.55 | 30 | 30   | 0.9978 | 0.9977 | 1e-04  | 10000 | 10000 |
| CLP | 2 | 1 | 0.55 | 30 | 27   | 0.9939 | 0.9924 | 0.0015 | 10000 | 10000 |

|     |   |   |      |    |      |        |        |        |       |       |
|-----|---|---|------|----|------|--------|--------|--------|-------|-------|
| CLP | 3 | 1 | 0.55 | 30 | 24   | 0.984  | 0.9814 | 0.0026 | 10000 | 10000 |
| CLP | 1 | 1 | 0.6  | 30 | 30   | 0.9996 | 0.9998 | 2e-04  | 10000 | 10000 |
| CLP | 2 | 1 | 0.6  | 30 | 27   | 0.9985 | 0.998  | 5e-04  | 10000 | 10000 |
| CLP | 3 | 1 | 0.6  | 30 | 24   | 0.9949 | 0.9925 | 0.0024 | 10000 | 10000 |
| CLP | 1 | 1 | 0.65 | 30 | 30   | 0.9999 | 0.9999 | 0      | 10000 | 10000 |
| CLP | 2 | 1 | 0.65 | 30 | 27   | 0.9997 | 0.9999 | 2e-04  | 10000 | 10000 |
| CLP | 3 | 1 | 0.65 | 30 | 24   | 0.9986 | 0.9976 | 0.001  | 10000 | 10000 |
| CLP | 1 | 1 | 0.7  | 30 | 30   | 1      | 1      | 0      | 10000 | 10000 |
| CLP | 2 | 1 | 0.7  | 30 | 27   | 0.9999 | 1      | 1e-04  | 10000 | 10000 |
| CLP | 3 | 1 | 0.7  | 30 | 24   | 0.9997 | 0.9991 | 6e-04  | 10000 | 10000 |
| CLP | 1 | 1 | 0    | 36 | 36   | 0.01   | 0.0116 | 0.0016 | 10000 | 10000 |
| CLP | 2 | 1 | 0    | 36 | 32.4 | 0.01   | 0.0115 | 0.0015 | 10000 | 10000 |
| CLP | 3 | 1 | 0    | 36 | 28.8 | 0.01   | 0.0092 | 8e-04  | 10000 | 10000 |
| CLP | 1 | 1 | 0.05 | 36 | 36   | 0.0222 | 0.0204 | 0.0018 | 10000 | 10000 |
| CLP | 2 | 1 | 0.05 | 36 | 32.4 | 0.0207 | 0.0179 | 0.0028 | 10000 | 10000 |
| CLP | 3 | 1 | 0.05 | 36 | 28.8 | 0.0192 | 0.02   | 8e-04  | 10000 | 10000 |
| CLP | 1 | 1 | 0.1  | 36 | 36   | 0.0695 | 0.0674 | 0.0021 | 10000 | 10000 |
| CLP | 2 | 1 | 0.1  | 36 | 32.4 | 0.0612 | 0.0628 | 0.0016 | 10000 | 10000 |
| CLP | 3 | 1 | 0.1  | 36 | 28.8 | 0.0533 | 0.0499 | 0.0034 | 10000 | 10000 |
| CLP | 1 | 1 | 0.15 | 36 | 36   | 0.1754 | 0.1759 | 5e-04  | 10000 | 10000 |
| CLP | 2 | 1 | 0.15 | 36 | 32.4 | 0.1511 | 0.1488 | 0.0023 | 10000 | 10000 |
| CLP | 3 | 1 | 0.15 | 36 | 28.8 | 0.1279 | 0.1308 | 0.0029 | 10000 | 10000 |
| CLP | 1 | 1 | 0.2  | 36 | 36   | 0.3496 | 0.3555 | 0.0059 | 10000 | 10000 |
| CLP | 2 | 1 | 0.2  | 36 | 32.4 | 0.3023 | 0.3024 | 1e-04  | 10000 | 10000 |
| CLP | 3 | 1 | 0.2  | 36 | 28.8 | 0.2553 | 0.2681 | 0.0128 | 10000 | 10000 |
| CLP | 1 | 1 | 0.25 | 36 | 36   | 0.5635 | 0.5687 | 0.0052 | 10000 | 10000 |
| CLP | 2 | 1 | 0.25 | 36 | 32.4 | 0.4983 | 0.49   | 0.0083 | 10000 | 10000 |
| CLP | 3 | 1 | 0.25 | 36 | 28.8 | 0.4287 | 0.4338 | 0.0051 | 10000 | 10000 |
| CLP | 1 | 1 | 0.3  | 36 | 36   | 0.7599 | 0.7623 | 0.0024 | 10000 | 10000 |
| CLP | 2 | 1 | 0.3  | 36 | 32.4 | 0.6945 | 0.6935 | 0.001  | 10000 | 10000 |
| CLP | 3 | 1 | 0.3  | 36 | 28.8 | 0.6172 | 0.6237 | 0.0065 | 10000 | 10000 |
| CLP | 1 | 1 | 0.35 | 36 | 36   | 0.8946 | 0.8924 | 0.0022 | 10000 | 10000 |
| CLP | 2 | 1 | 0.35 | 36 | 32.4 | 0.8464 | 0.8452 | 0.0012 | 10000 | 10000 |
| CLP | 3 | 1 | 0.35 | 36 | 28.8 | 0.781  | 0.7742 | 0.0068 | 10000 | 10000 |
| CLP | 1 | 1 | 0.4  | 36 | 36   | 0.9638 | 0.9656 | 0.0018 | 10000 | 10000 |
| CLP | 2 | 1 | 0.4  | 36 | 32.4 | 0.9374 | 0.9395 | 0.0021 | 10000 | 10000 |
| CLP | 3 | 1 | 0.4  | 36 | 28.8 | 0.8948 | 0.8931 | 0.0017 | 10000 | 10000 |
| CLP | 1 | 1 | 0.45 | 36 | 36   | 0.9904 | 0.9896 | 8e-04  | 10000 | 10000 |
| CLP | 2 | 1 | 0.45 | 36 | 32.4 | 0.9796 | 0.9771 | 0.0025 | 10000 | 10000 |
| CLP | 3 | 1 | 0.45 | 36 | 28.8 | 0.9581 | 0.958  | 1e-04  | 10000 | 10000 |
| CLP | 1 | 1 | 0.5  | 36 | 36   | 0.9981 | 0.9989 | 8e-04  | 10000 | 10000 |
| CLP | 2 | 1 | 0.5  | 36 | 32.4 | 0.9947 | 0.9942 | 5e-04  | 10000 | 10000 |
| CLP | 3 | 1 | 0.5  | 36 | 28.8 | 0.9863 | 0.9848 | 0.0015 | 10000 | 10000 |
| CLP | 1 | 1 | 0.55 | 36 | 36   | 0.9997 | 0.9994 | 3e-04  | 10000 | 10000 |
| CLP | 2 | 1 | 0.55 | 36 | 32.4 | 0.9989 | 0.9992 | 3e-04  | 10000 | 10000 |

|     |   |   |      |    |      |        |        |        |       |       |
|-----|---|---|------|----|------|--------|--------|--------|-------|-------|
| CLP | 3 | 1 | 0.55 | 36 | 28.8 | 0.9963 | 0.9945 | 0.0018 | 10000 | 10000 |
| CLP | 1 | 1 | 0.6  | 36 | 36   | 1      | 1      | 0      | 10000 | 10000 |
| CLP | 2 | 1 | 0.6  | 36 | 32.4 | 0.9998 | 0.9999 | 1e-04  | 10000 | 10000 |
| CLP | 3 | 1 | 0.6  | 36 | 28.8 | 0.9992 | 0.9986 | 6e-04  | 10000 | 10000 |
| CLP | 1 | 1 | 0.65 | 36 | 36   | 1      | 1      | 0      | 10000 | 10000 |
| CLP | 2 | 1 | 0.65 | 36 | 32.4 | 1      | 0.9998 | 2e-04  | 10000 | 10000 |
| CLP | 3 | 1 | 0.65 | 36 | 28.8 | 0.9999 | 0.9996 | 3e-04  | 10000 | 10000 |
| CLP | 1 | 1 | 0.7  | 36 | 36   | 1      | 1      | 0      | 10000 | 10000 |
| CLP | 2 | 1 | 0.7  | 36 | 32.4 | 1      | 1      | 0      | 10000 | 10000 |
| CLP | 3 | 1 | 0.7  | 36 | 28.8 | 1      | 1      | 0      | 10000 | 10000 |
